# Supplementary material for: Leptin Induces Proadipogenic and Proinflammatory Signaling in Adipocytes
Source: PubMed Central journal article supplement (PMC6923660; doi:10.3389/fendo.2019.00841), 2019-12-13
Supplement: Image_2.pdf [file Image_2.pdf]

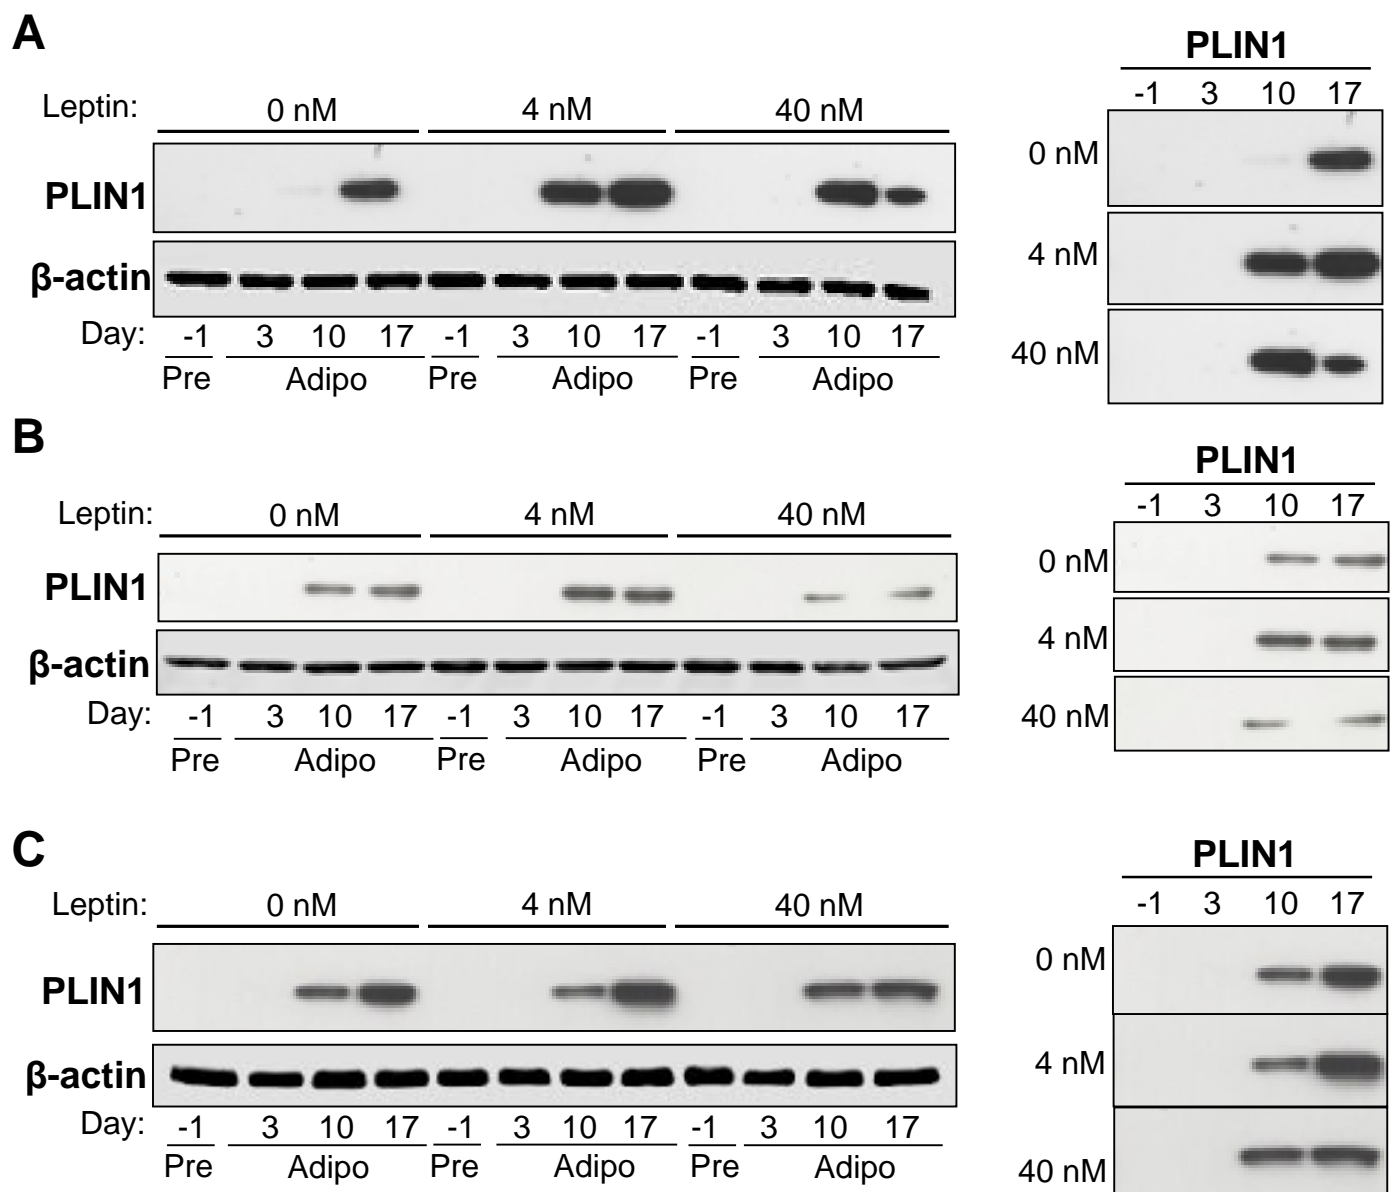

## Supplementary Figure 2.

### Replicates Figure 1

#### A-C

**PLIN1 replicates relative to figure 1D.** 3T3-L1 preadipocytes (day -1) and adipocytes (days 3, 10 and 17) were treated with 0, 4 or 40 nM of leptin during all the culture period and lysates were analysed by western blot. Blots represent 3 independent experiments and are cropped on the right panels for clearer comparison among groups.

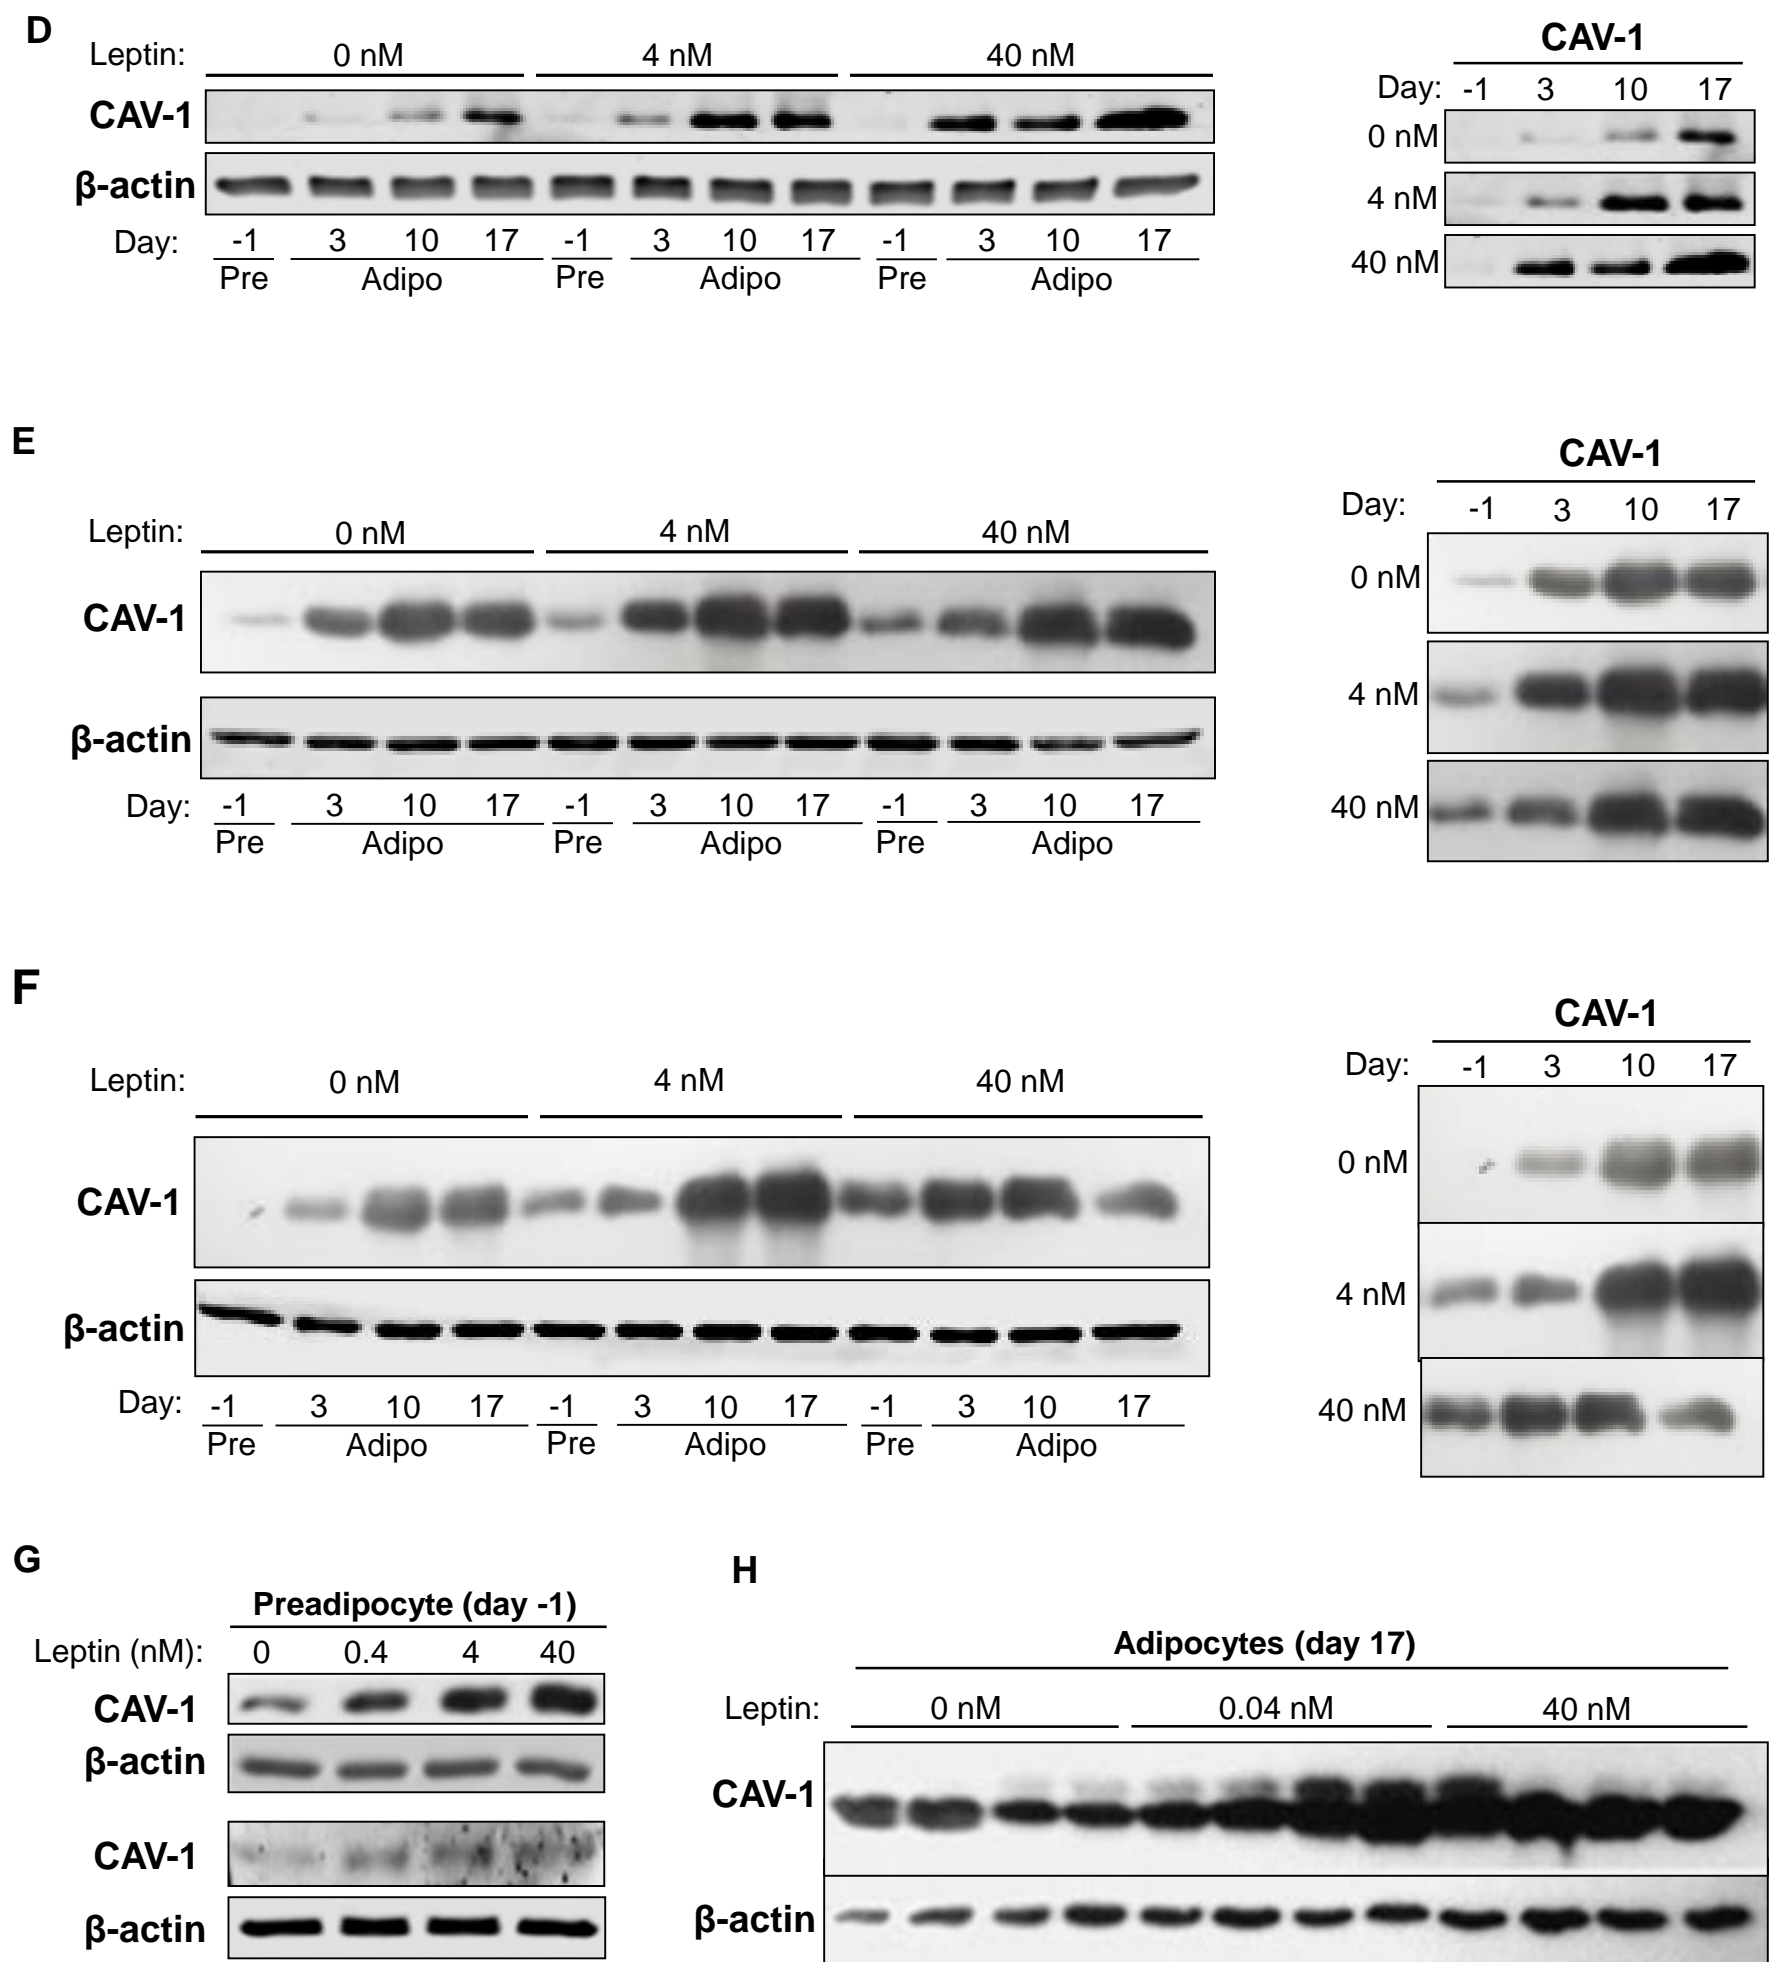

### Replicates Figure 1

#### D-H

**CAV-1 replicates relative to figure 1D.** 3T3-L1 preadipocytes (day -1) and adipocytes (days 3, 10 and 17) were treated with 0, 0.04, 0.4, 4 or 40 nM of leptin during all the culture period and lysates were analysed by western blot. Blots are from 5 independent experiments and are cropped on the right for clearer comparison among groups. In **G** are shown 2 independent experiments.

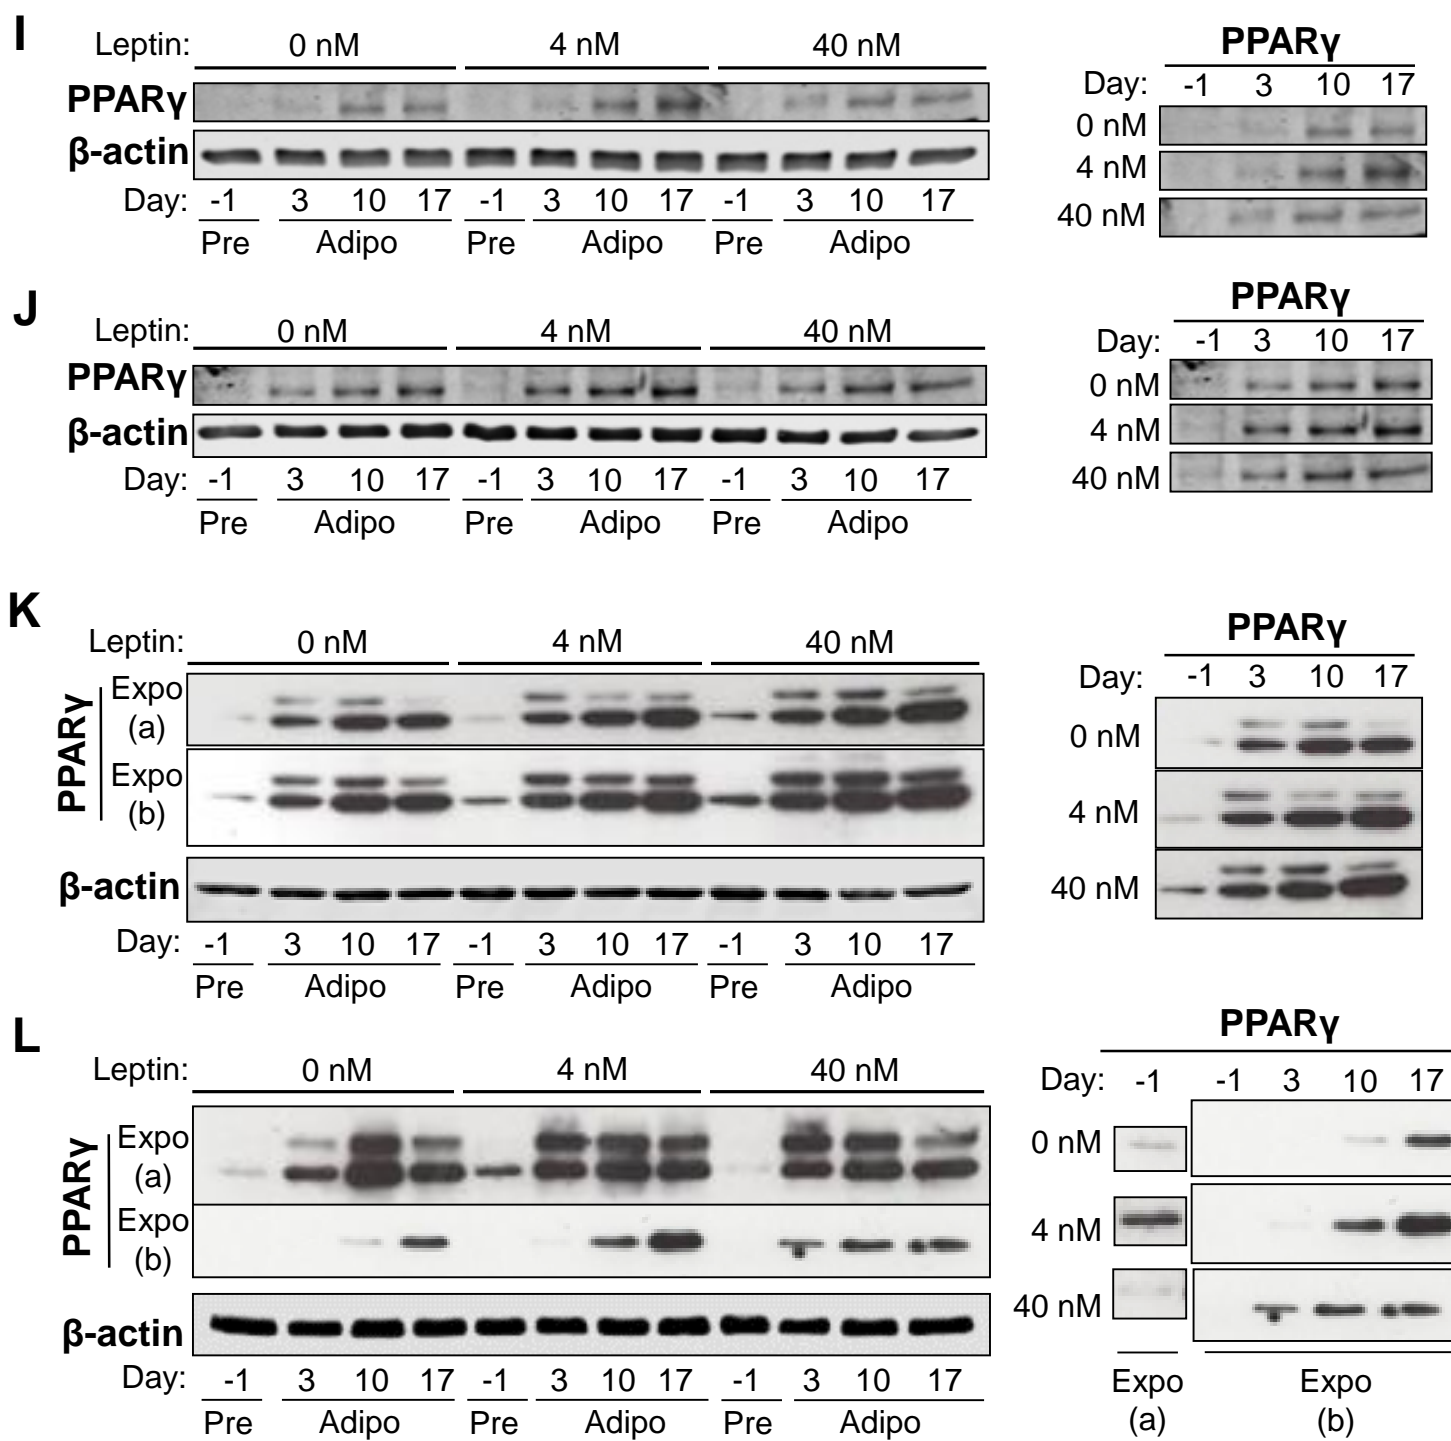

### Replicates Figure 1

#### I-L

. PPAR $\gamma$  replicates relative to figure 1D. 3T3-L1 preadipocytes (day -1) and adipocytes (days 3, 10 and 17) were treated with 0, 4 or 40 nM of leptin during all the culture period and lysates were analysed by western blot. Blots are from 4 independent experiments, and are cropped on the right panels for clearer comparison among groups. "Expo" means exposition time.

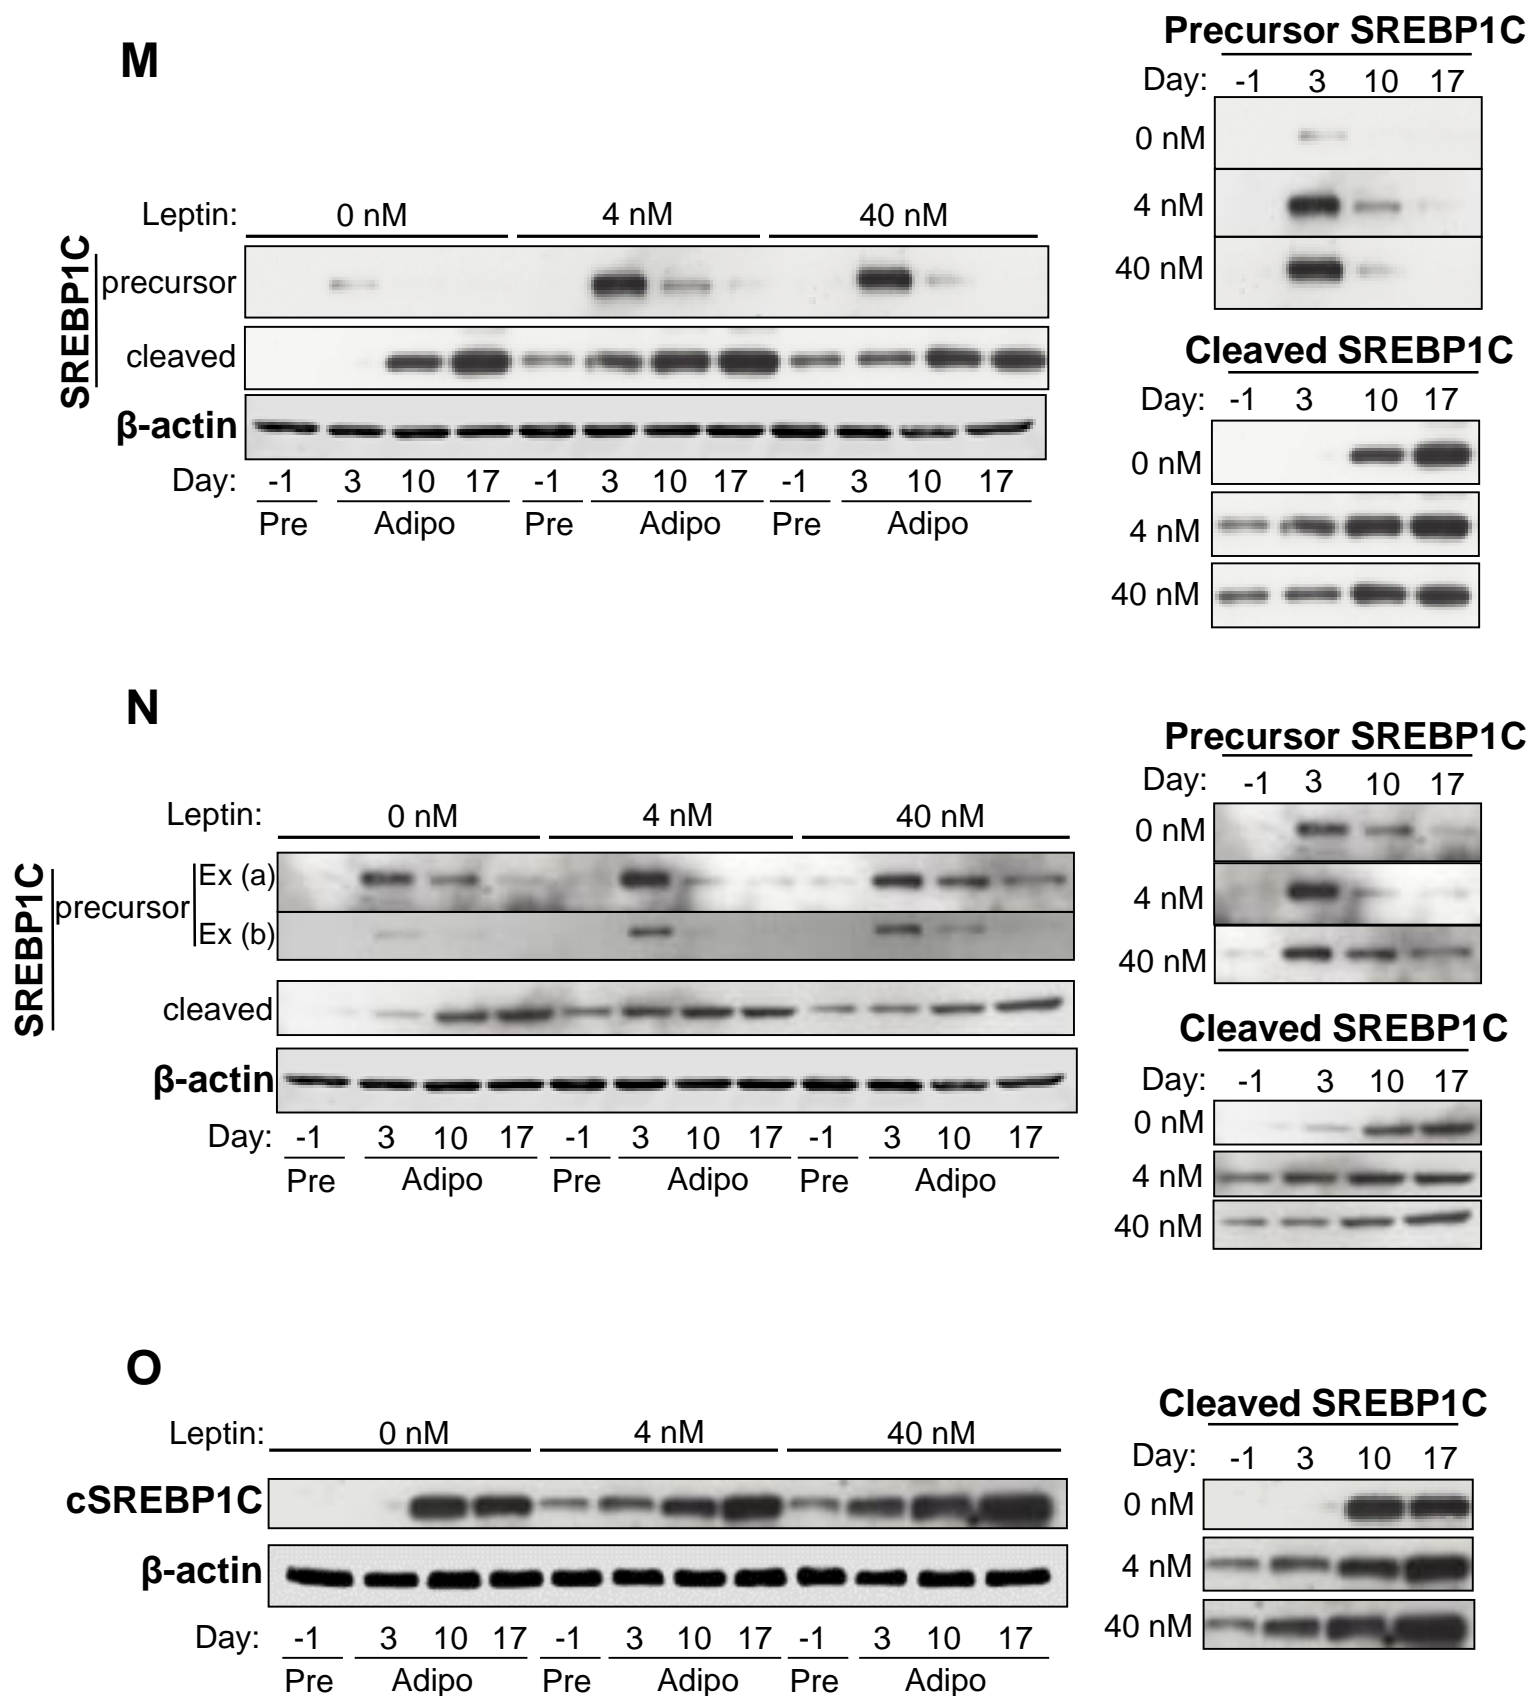

### Replicates Figure 1

#### M-O

**SREBP1C replicates relative to figure 1D.** 3T3-L1 preadipocytes (day -1) and adipocytes (days 3, 10 and 17) were treated with 0, 4 or 40 nM of leptin during all the culture period and lysates were analysed by western blot. Blots are from 3 independent experiments and are cropped on the right panels for clearer comparison among groups. "Ex" means exposition time.

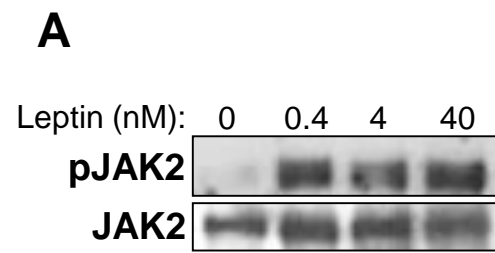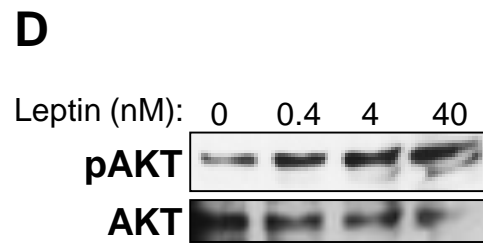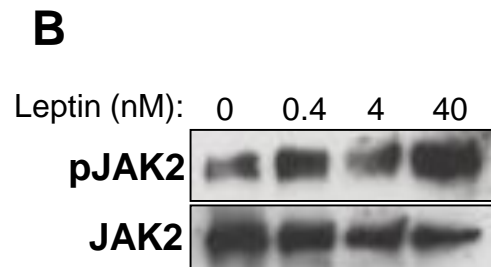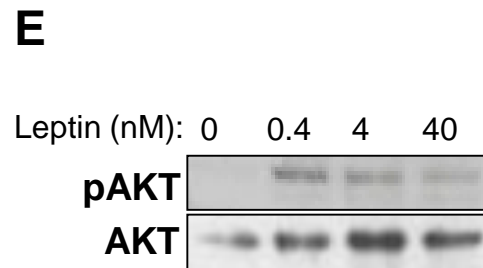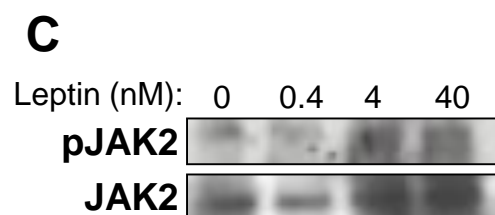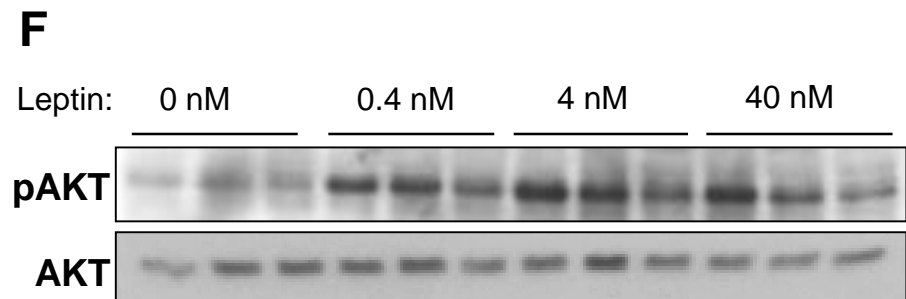

### Replicate Figure 2

Phospho JAK2 (pJAK2), total JAK2 (JAK2), phospho AKT (pAKT) and total AKT (AKT) replicates relative to Figure 2A. 3T3-L1 cells were differentiated up to 17 days and then stimulated for 20 min with the indicated concentrations of leptin. Phosphorylation of (A-C) JAK2 and (D-F) AKT were evaluated by western blot from 3 different experiments (

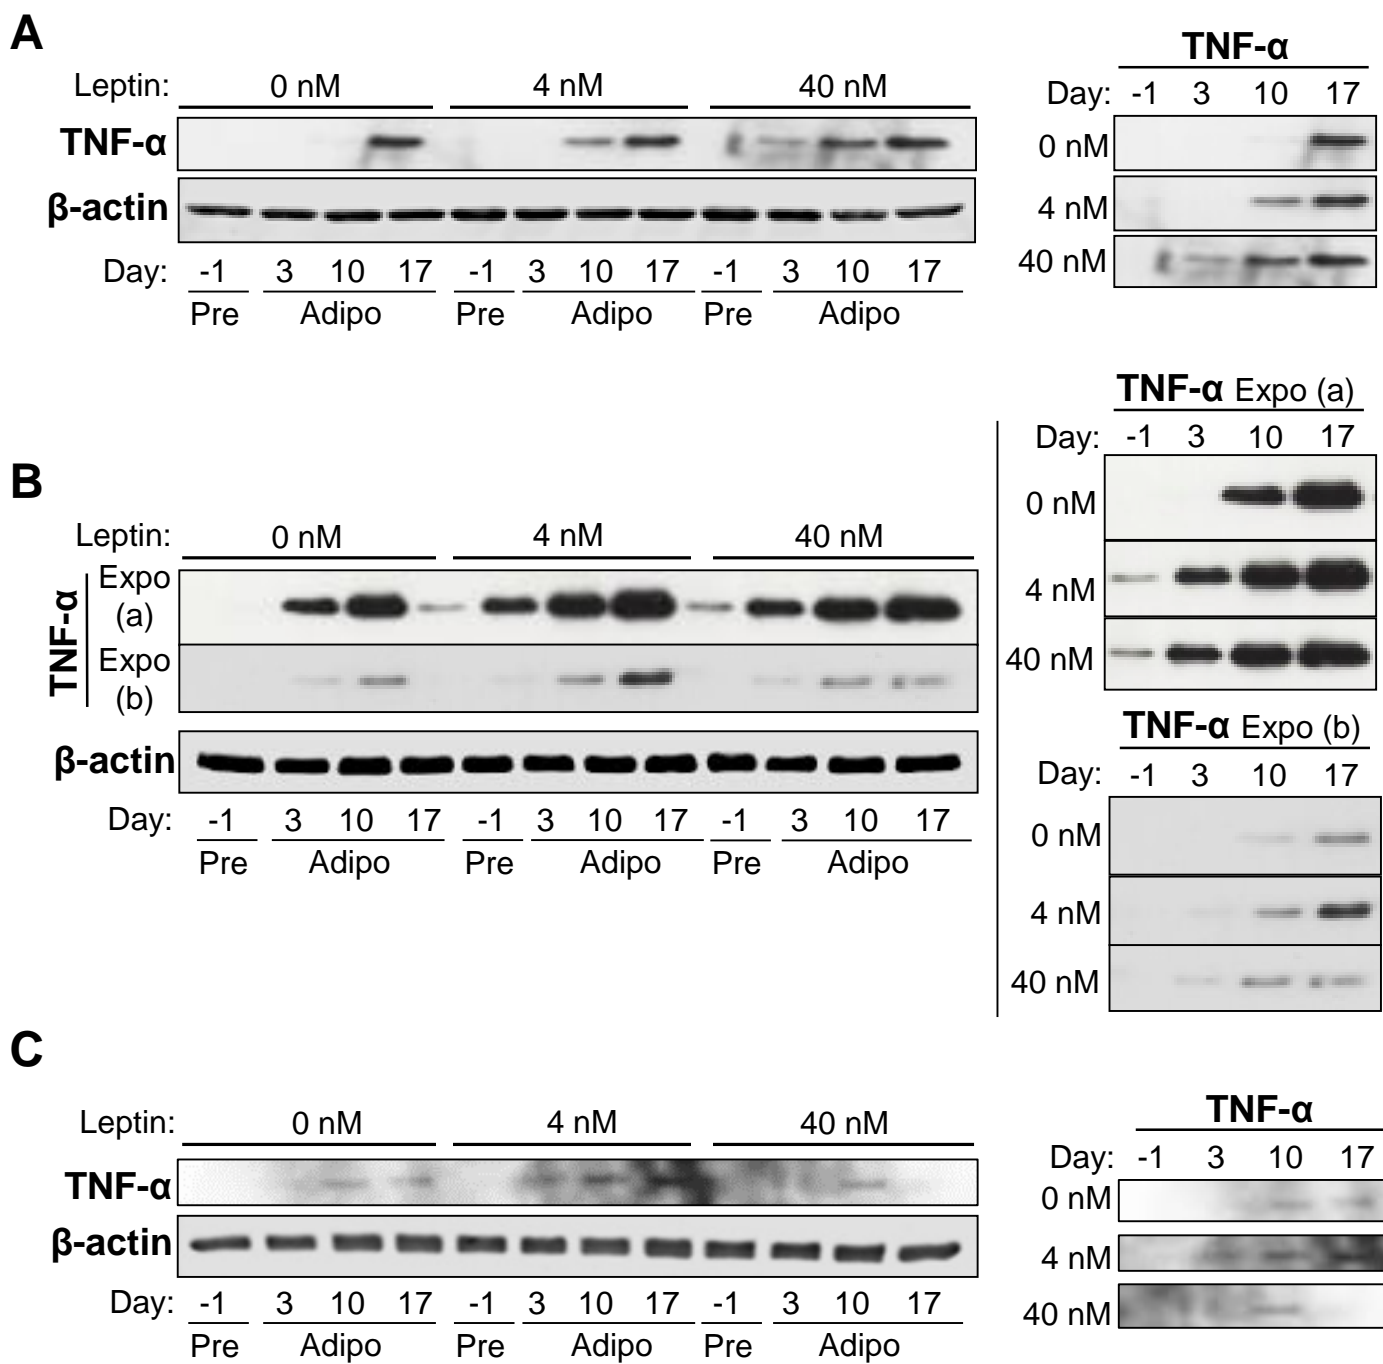

### Replicate Figure 3

**TNF- $\alpha$  replicates relative to figure 3A.** 3T3-L1 preadipocytes (day -1) and adipocytes (days 3, 10 and 17) were treated with 0, 4 or 40 nM of leptin during all the culture period and lysates were analysed by western blot. Blots are from 3 independent experiments and are cropped on the right panels for clearer comparison among groups. "Expo" means exposition time.

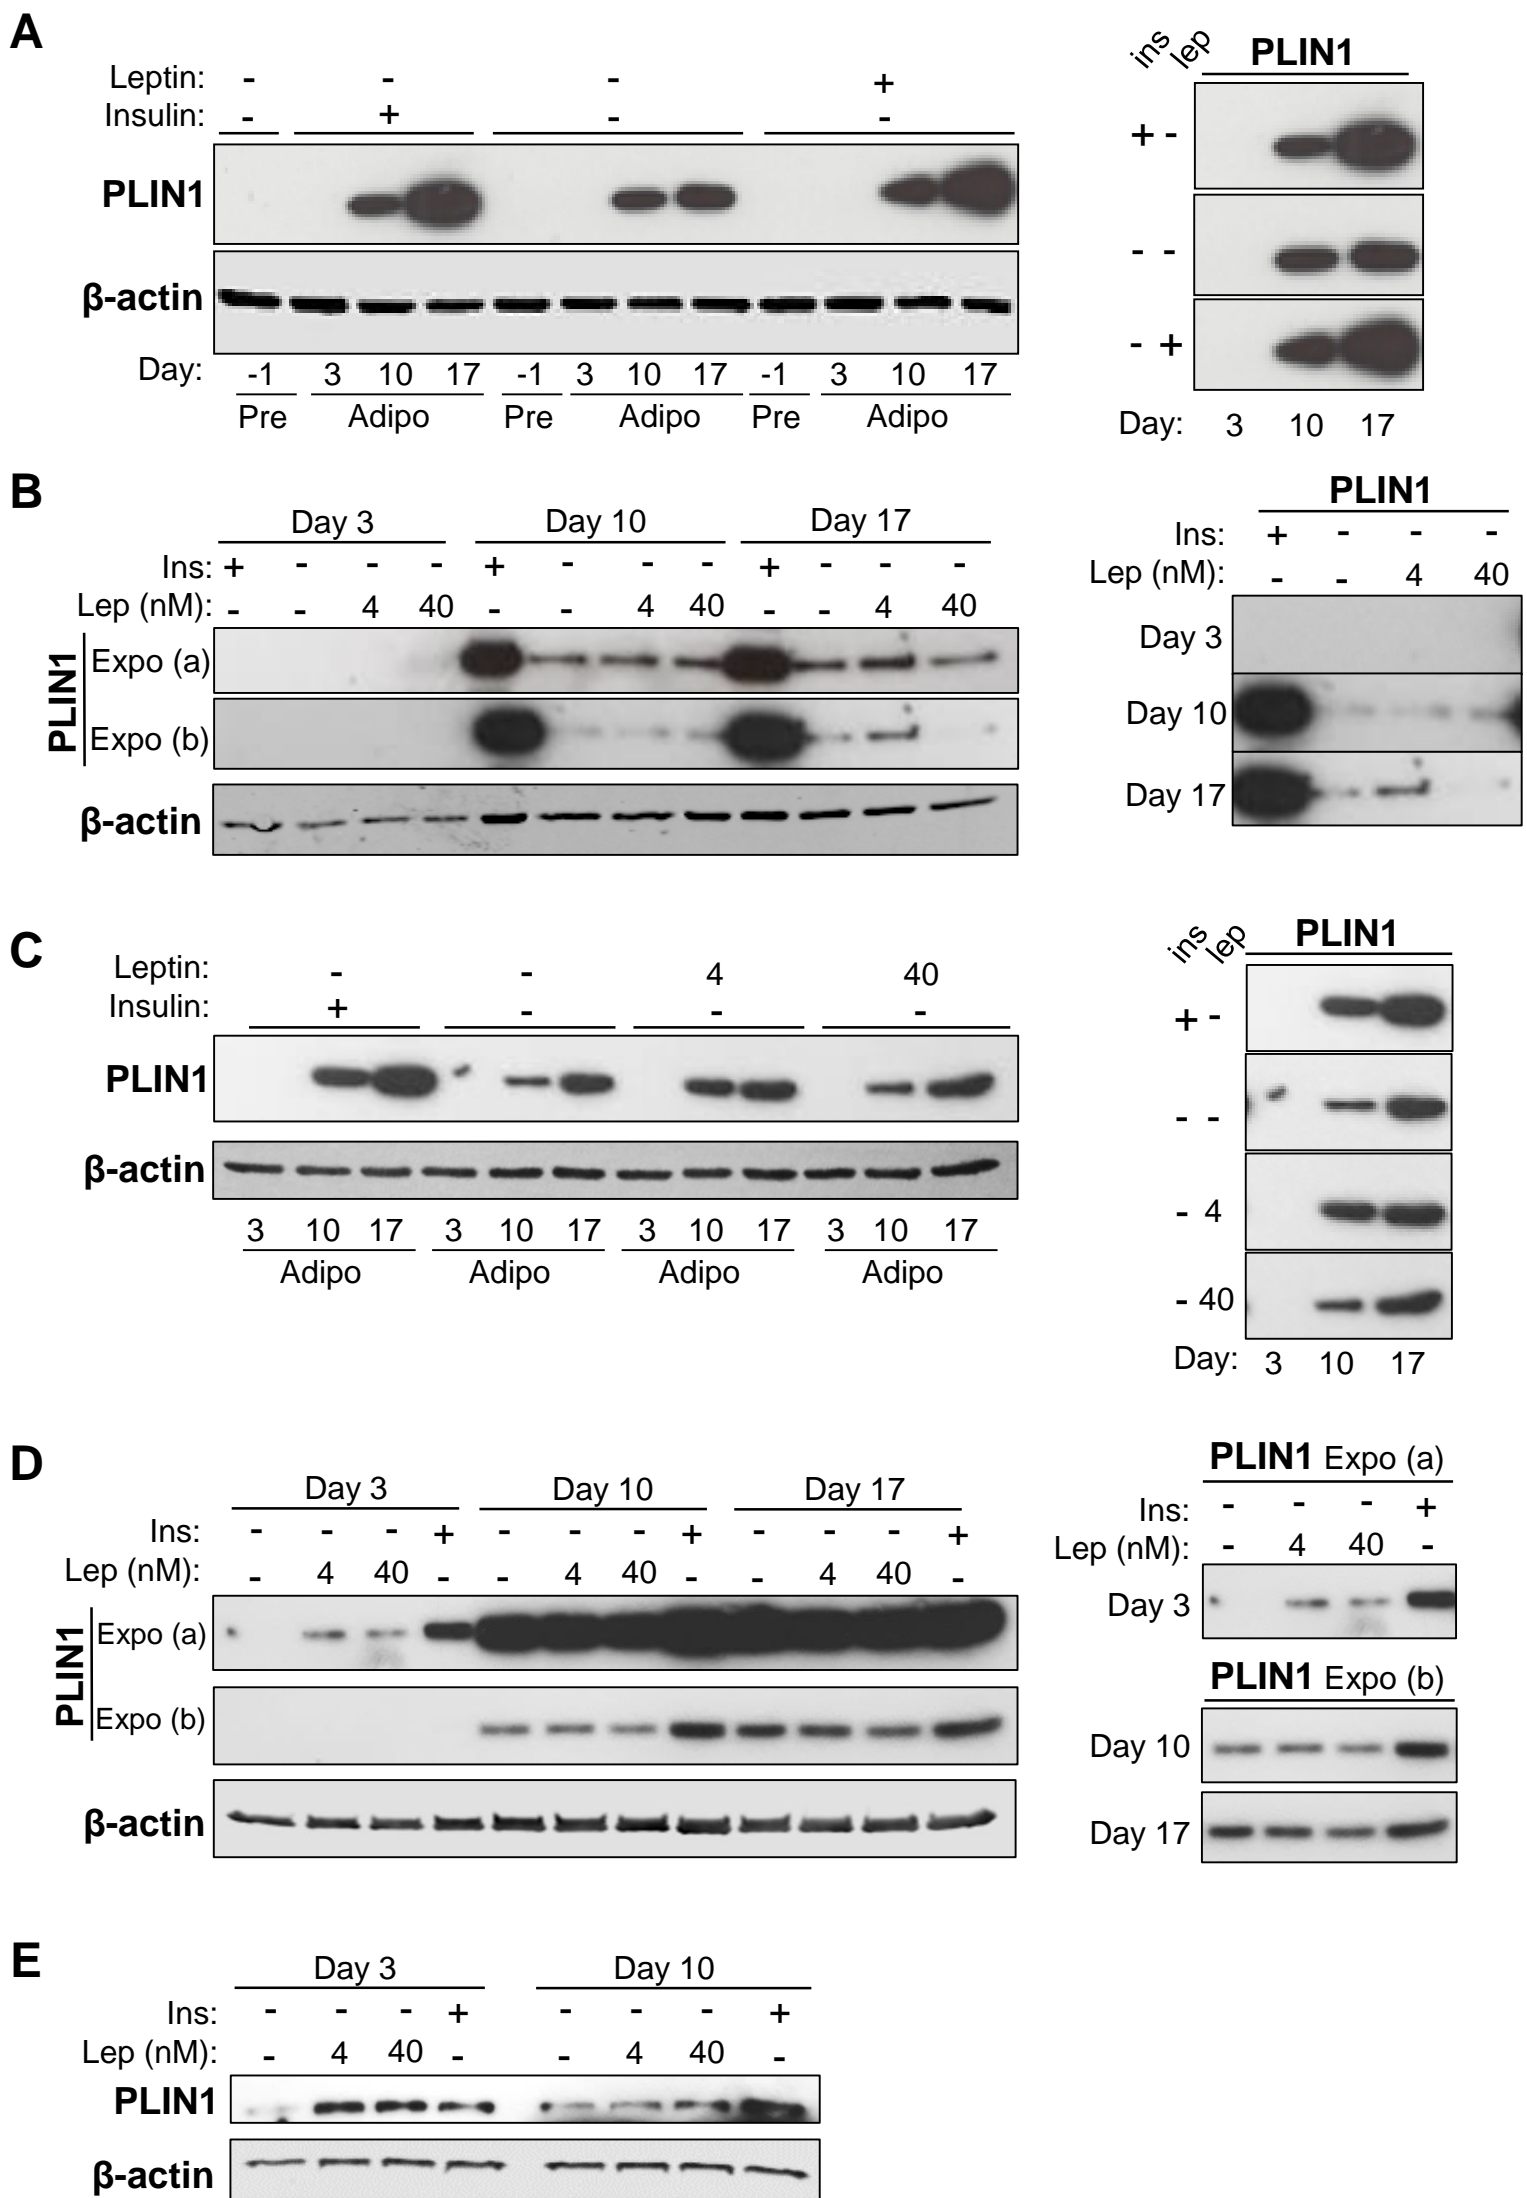

### Replicates Figure 4

#### A-E

PLIN1 replicates relative to figure 4C. (A-E) 3T3-L1 preadipocytes (day -1) and adipocytes (days 3, 10 and 17) were treated with 0, 4 or 40 nM of leptin, in the presence or absence of insulin from day 0 on. Lysates were analysed by western blot. Blots are from 5 independent experiments and are cropped on the right for clearer comparison among groups. "Expo" means exposition time.

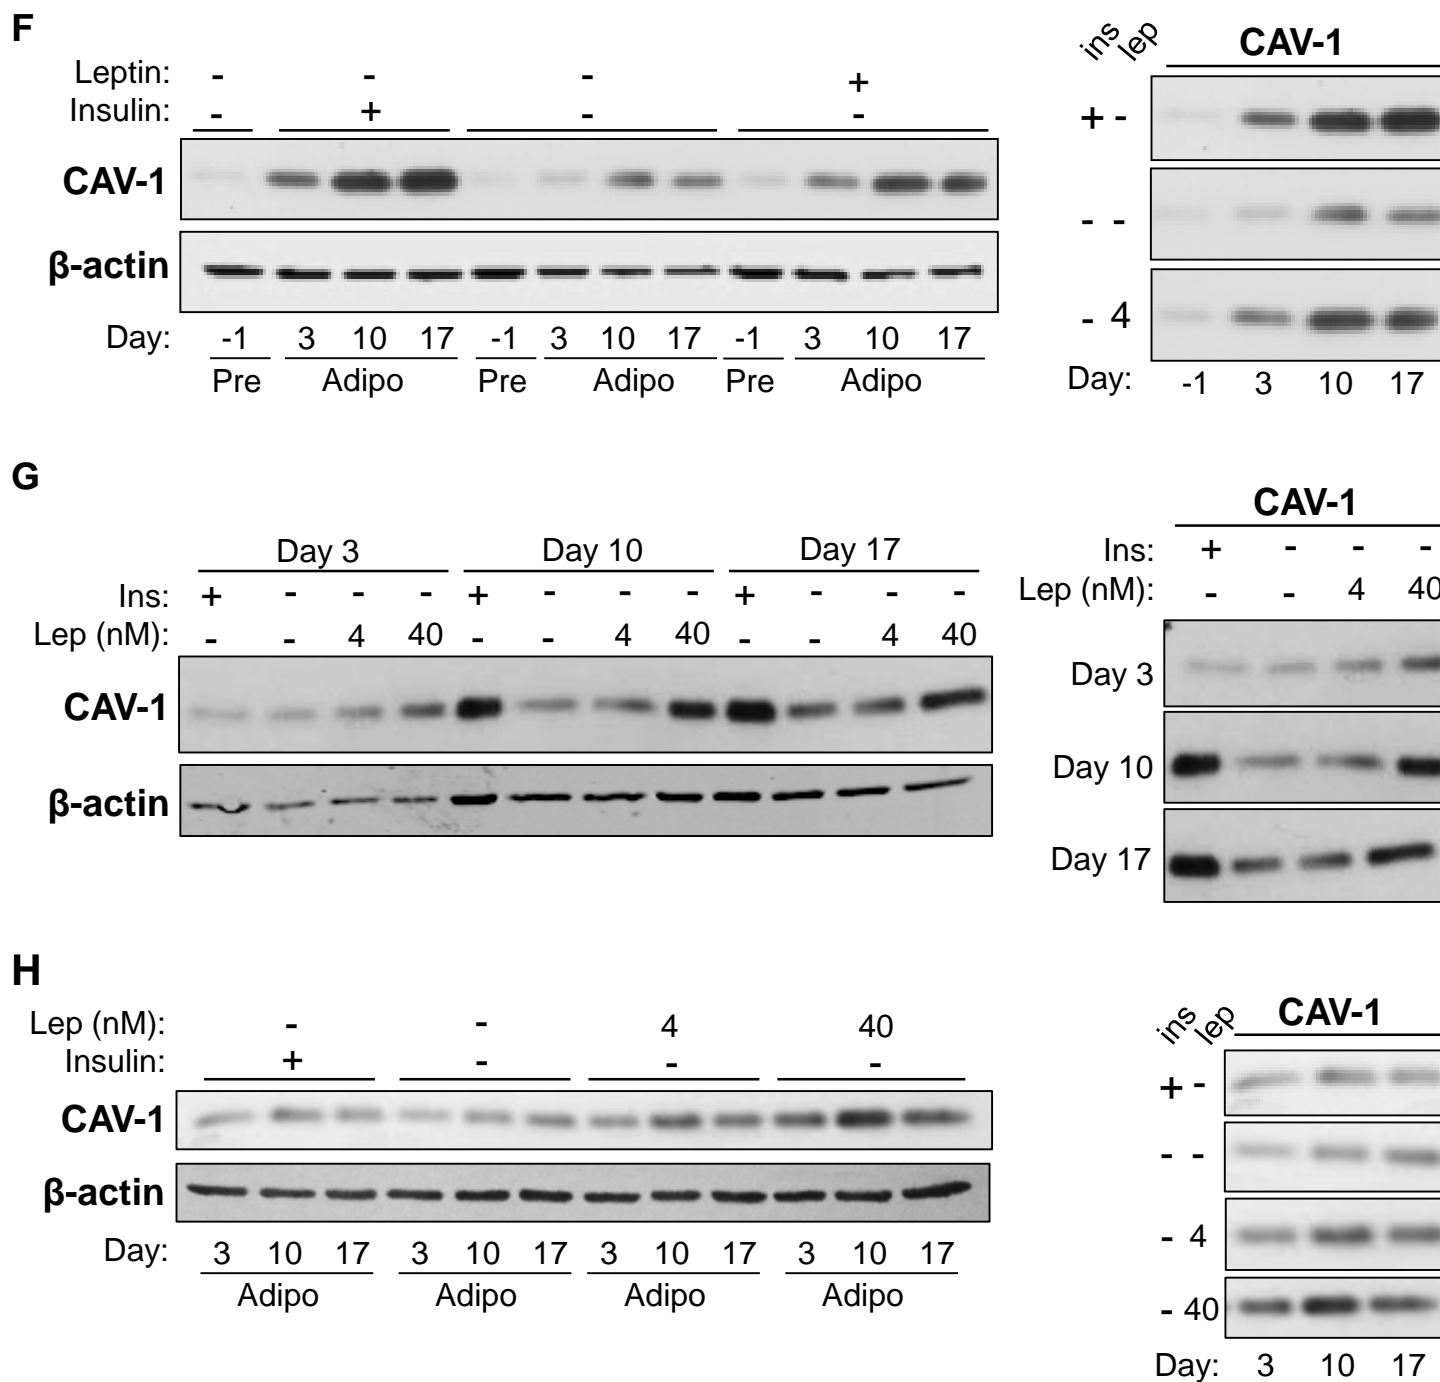

### Replicates Figure 4

#### F-H

**CAV-1 replicates relative to figure 4C.** 3T3-L1 preadipocytes (day -1) and adipocytes (days 3, 10 and 17) were treated with 0, 4 or 40 nM of leptin, in the presence or absence of insulin from day 0 on. Lysates were analysed by western blot. Blots are from 3 independent experiments and are cropped on the right for clearer comparison among groups.



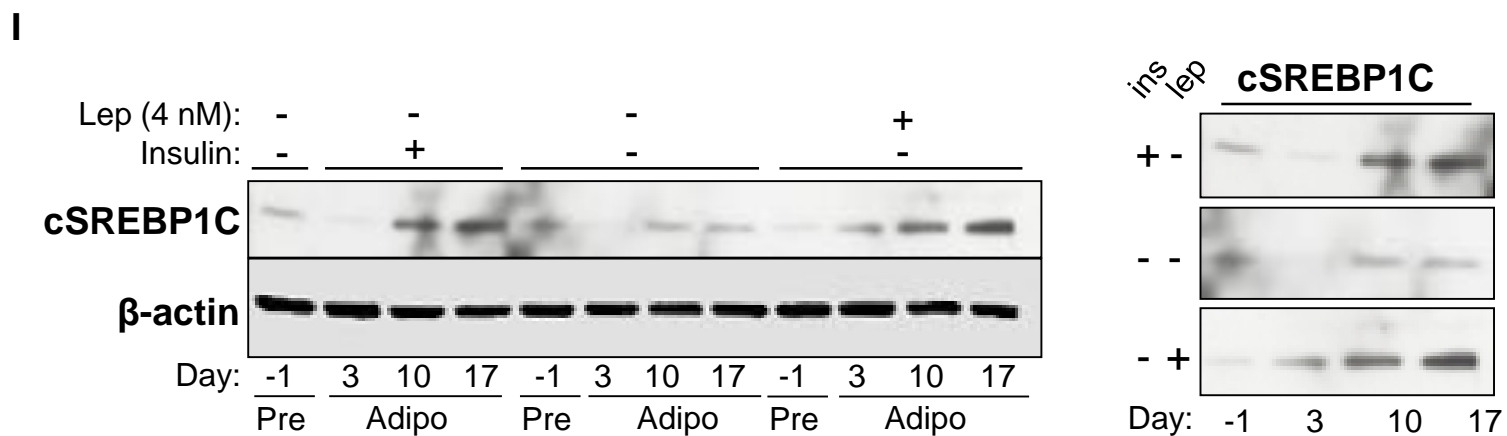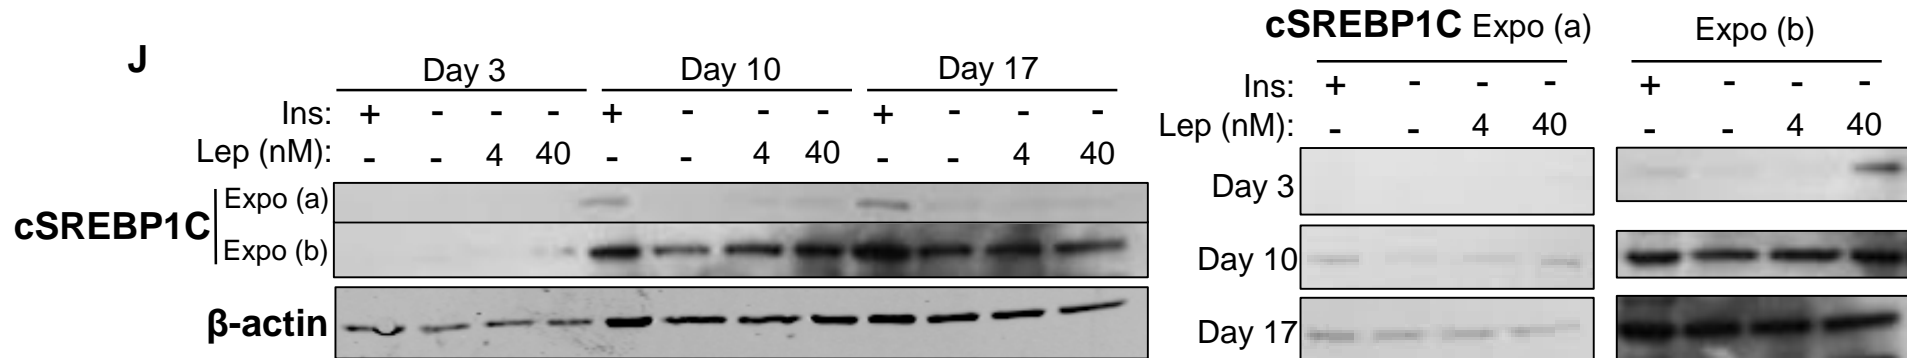

## Replicates Figure 4

### I-J

**cSREBP1C replicates relative to figure 4C. (A-C)** 3T3-L1 preadipocytes (day -1) and adipocytes (days 3, 10 and 17) were treated with 0, 4 or 40 nM of leptin, in the presence or absence of insulin from day 0 on. Lysates were analysed by western blot. Blots are from 2 independent experiments and are cropped on the right for clearer comparison among groups.

**K**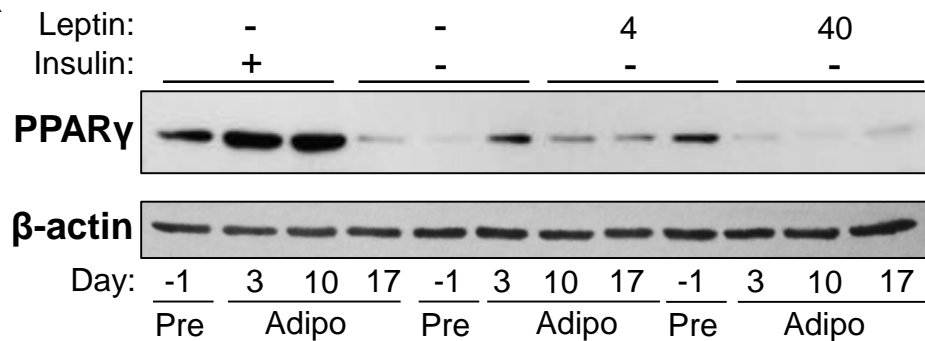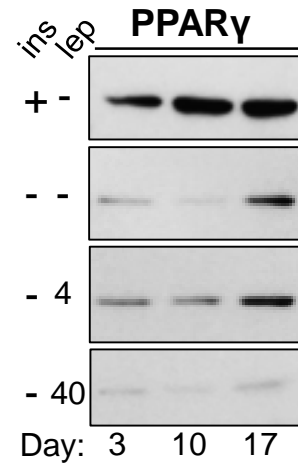**L**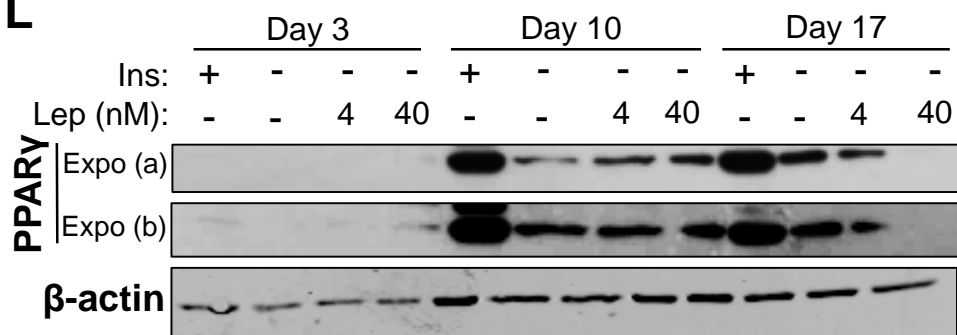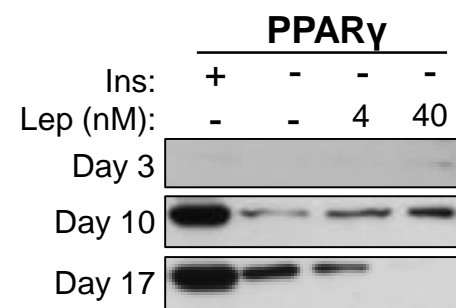**M**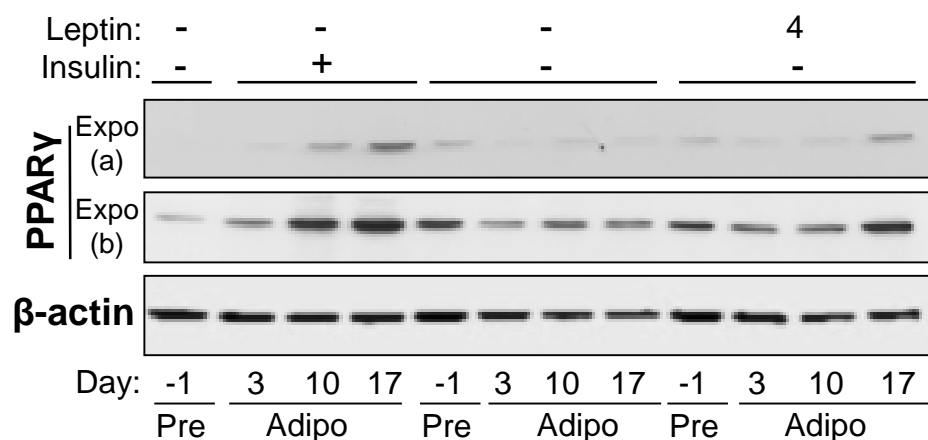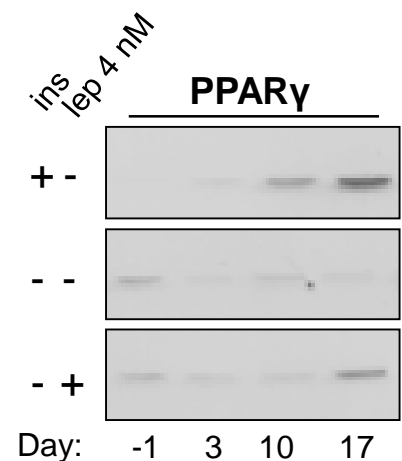**Replicates Figure 4****K-M**

**PPAR $\gamma$  replicates relative to figure 4C. (A-C)** 3T3-L1 preadipocytes (day -1) and adipocytes (days 3, 10 and 17) were treated with 0, 4 or 40 nM of leptin, in the presence or absence of insulin from day 0 on. Lysates were analysed by western blot. Blots are from 2 independent experiments and are cropped on the right for clearer comparison among groups.

**A**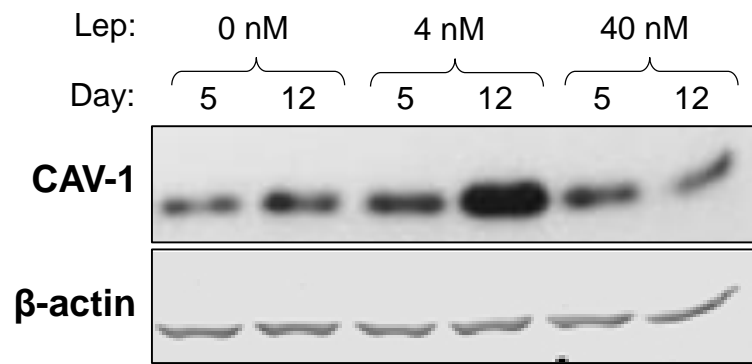**B**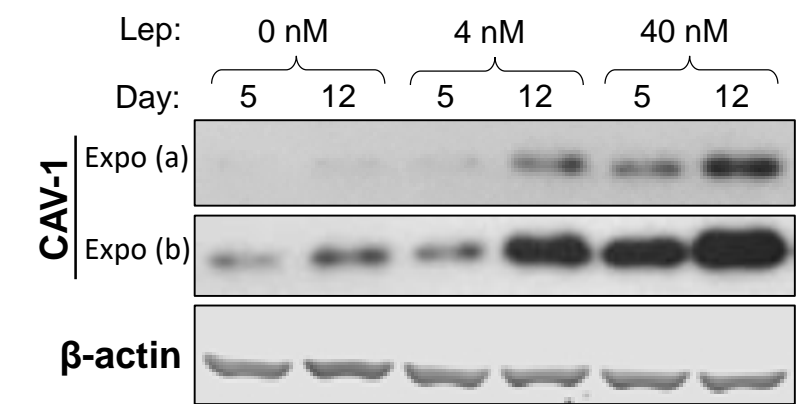**C**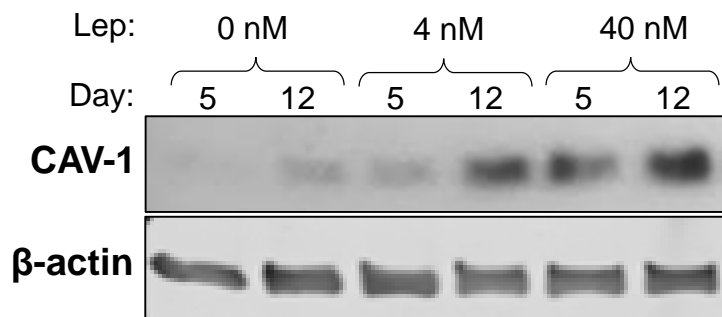**D**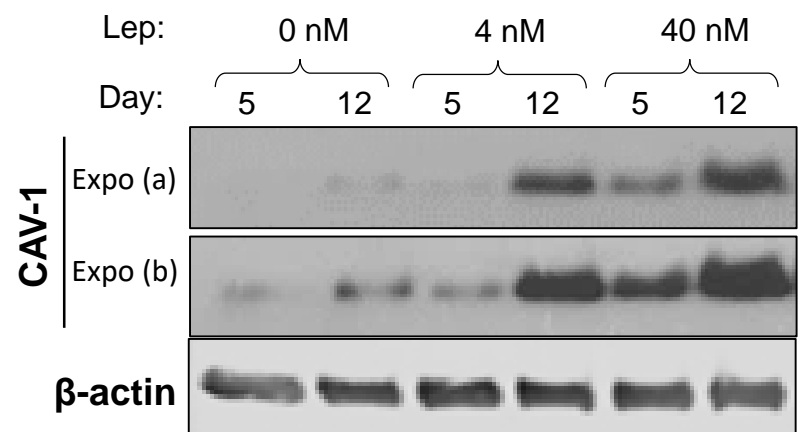**E**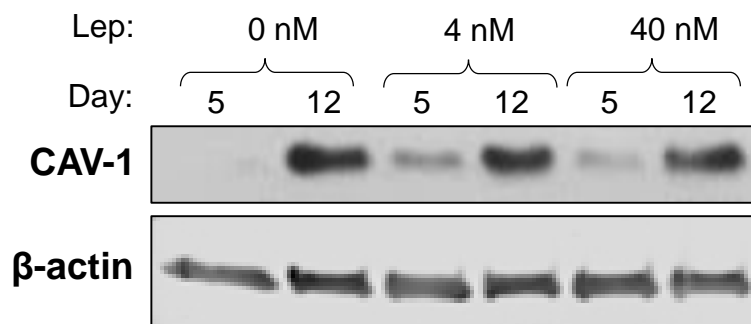**Replicates Figure 5****A-E.**

**CAV-1 replicates relative to figure 5C.** Retroperitoneal ASCs differentiated into adipocytes for 5 or 12 days were treated with 0, 4 or 40 nM of leptin during all the culture period. Lysates were analysed by Western blot for CAV-1. Blots are from 5 independent experiments as can be followed by the  $\beta$ -actin lanes. "Expo" means exposition time.

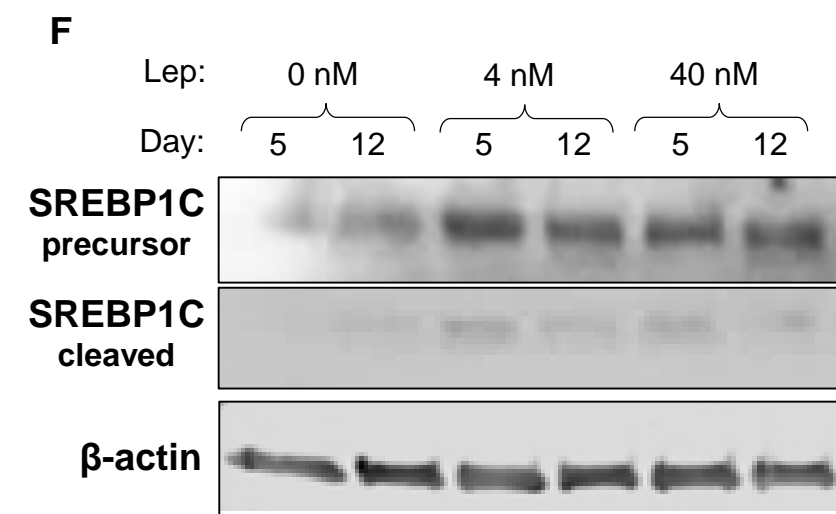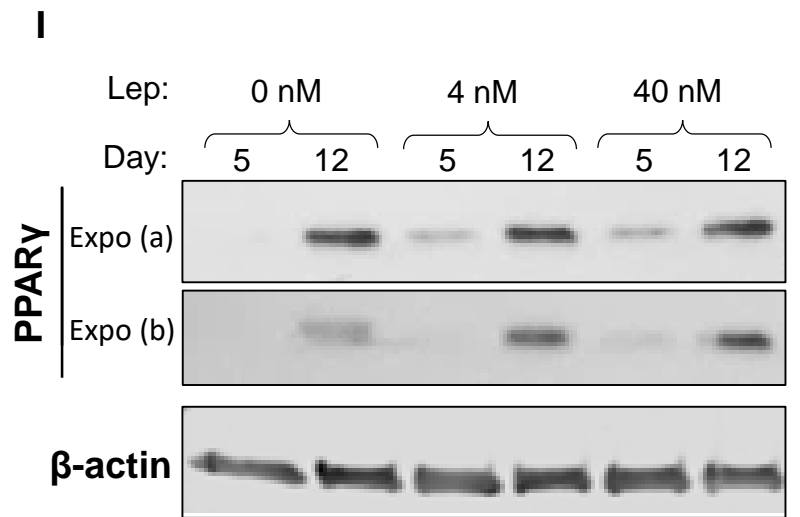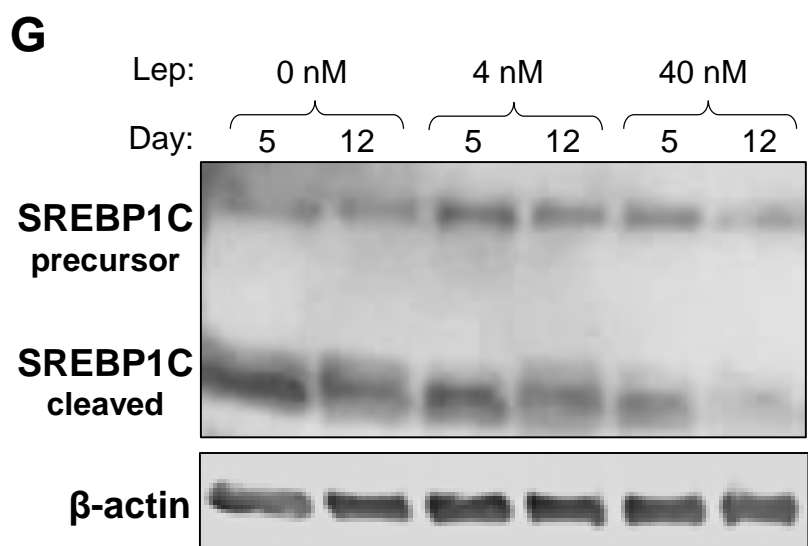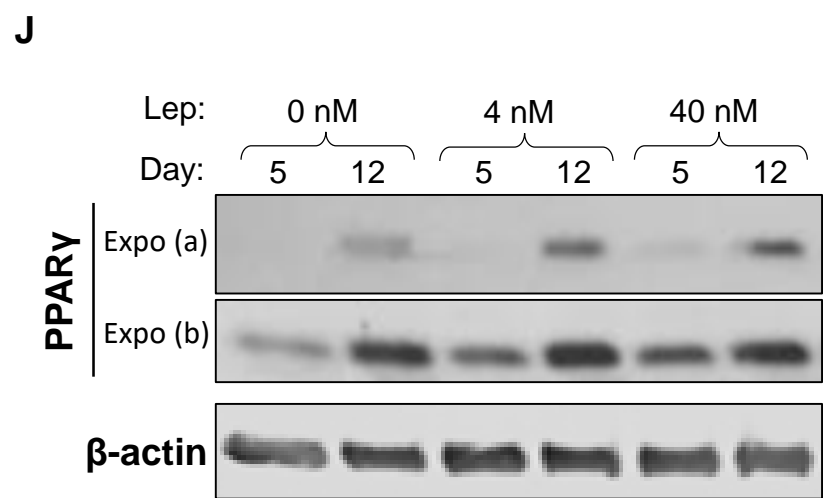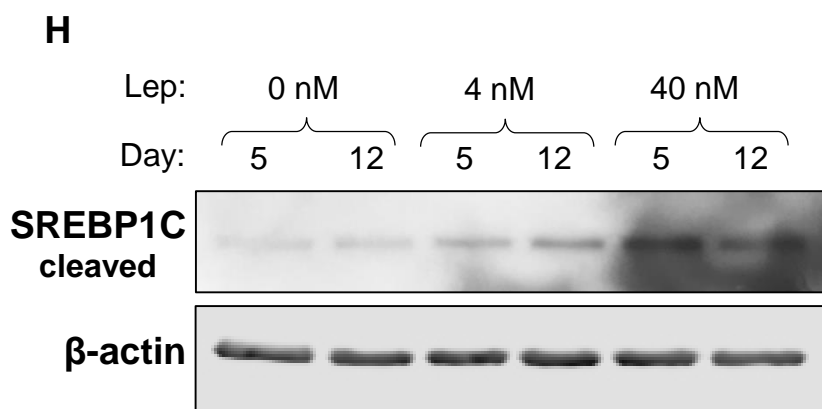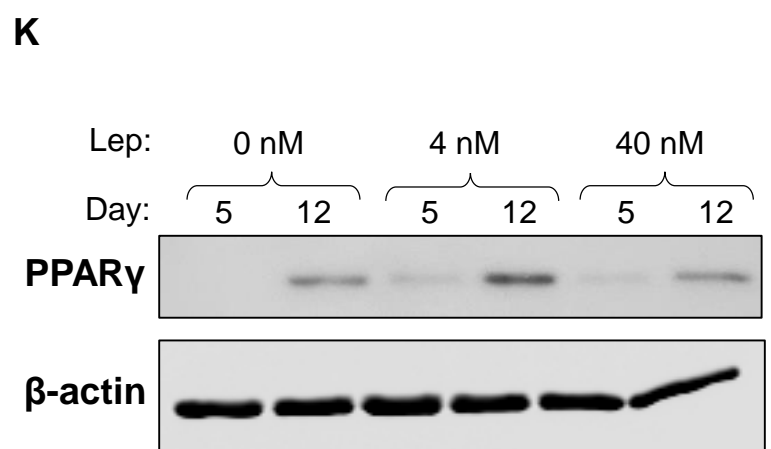

### Replicates Figure 5

#### F-K.

**SREBP1C and PPAR $\gamma$  replicates relative to figure 5C.** Retroperitoneal ASCs differentiated into adipocytes for 5 or 12 days were treated with 0, 4 or 40 nM of leptin during all the culture period. Lysates were analysed by Western blot for SREBP1C (F-H) and for PPAR $\gamma$  (I-K). Blots are from 4 independent experiments and some blots were done from the same samples/membranes as can be seen by the  $\beta$ -actin similar lanes (2 pairs A /D; B/E, C and F are from 2 other experiments). "Expo" means exposition time.

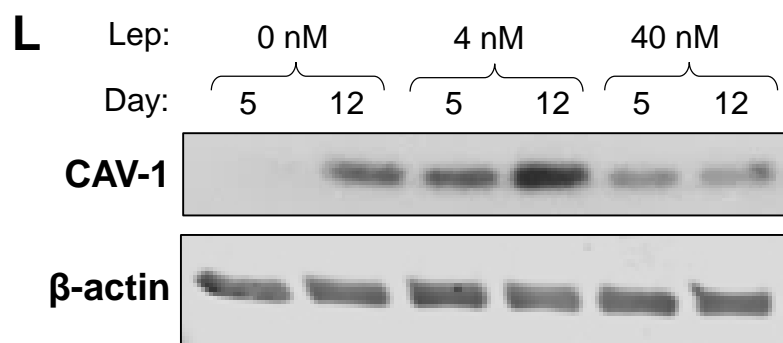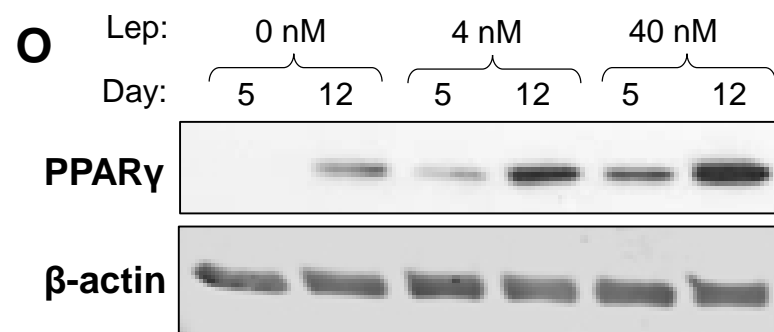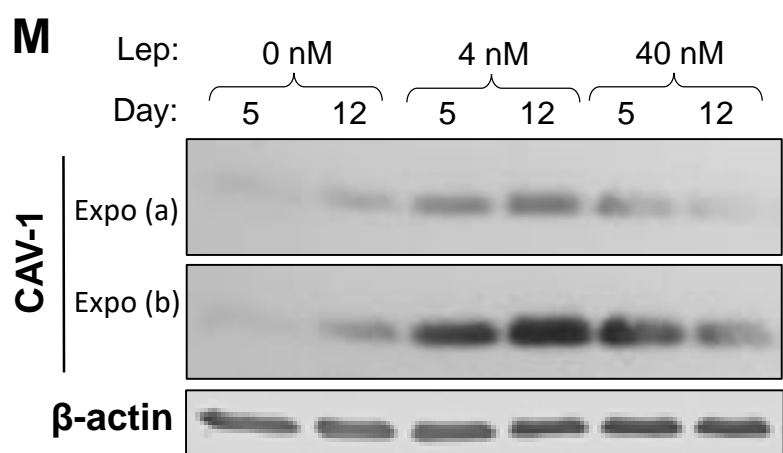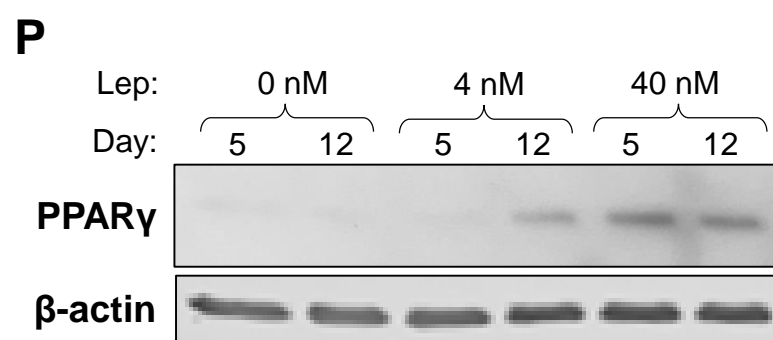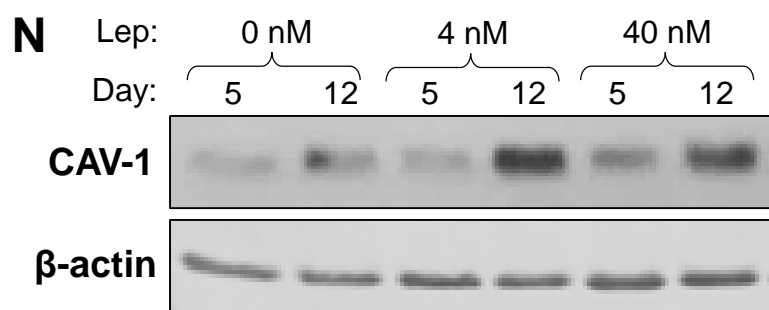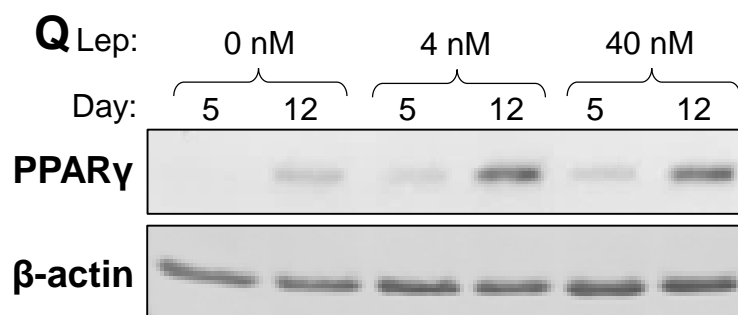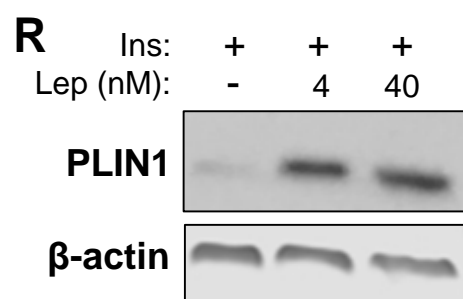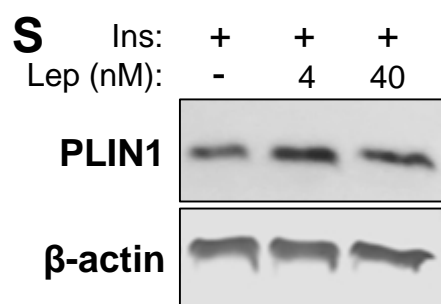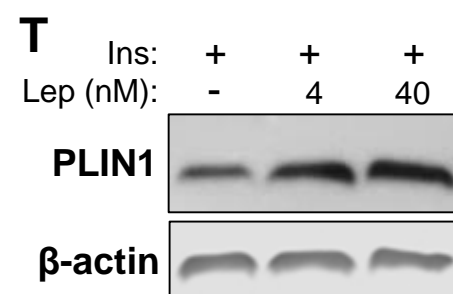

## Replicates Figure 5

### L-T.

**CAV-1, PPARγ and PLIN1 replicates relative to figure 5D.** Subcutaneous ASCs differentiated into adipocytes for 5 or 12 days were treated with 0, 4 or 40 nM of leptin during all the culture period (**L-Q**). Adipocytes with 12 days of differentiation (**R-T**). Lysates were analysed by Western blot for the expression of CAV-1 (**L-N**), PPARγ (**O-Q**) and PLIN1 (**R-T**). Blots are from 3 independent experiments.

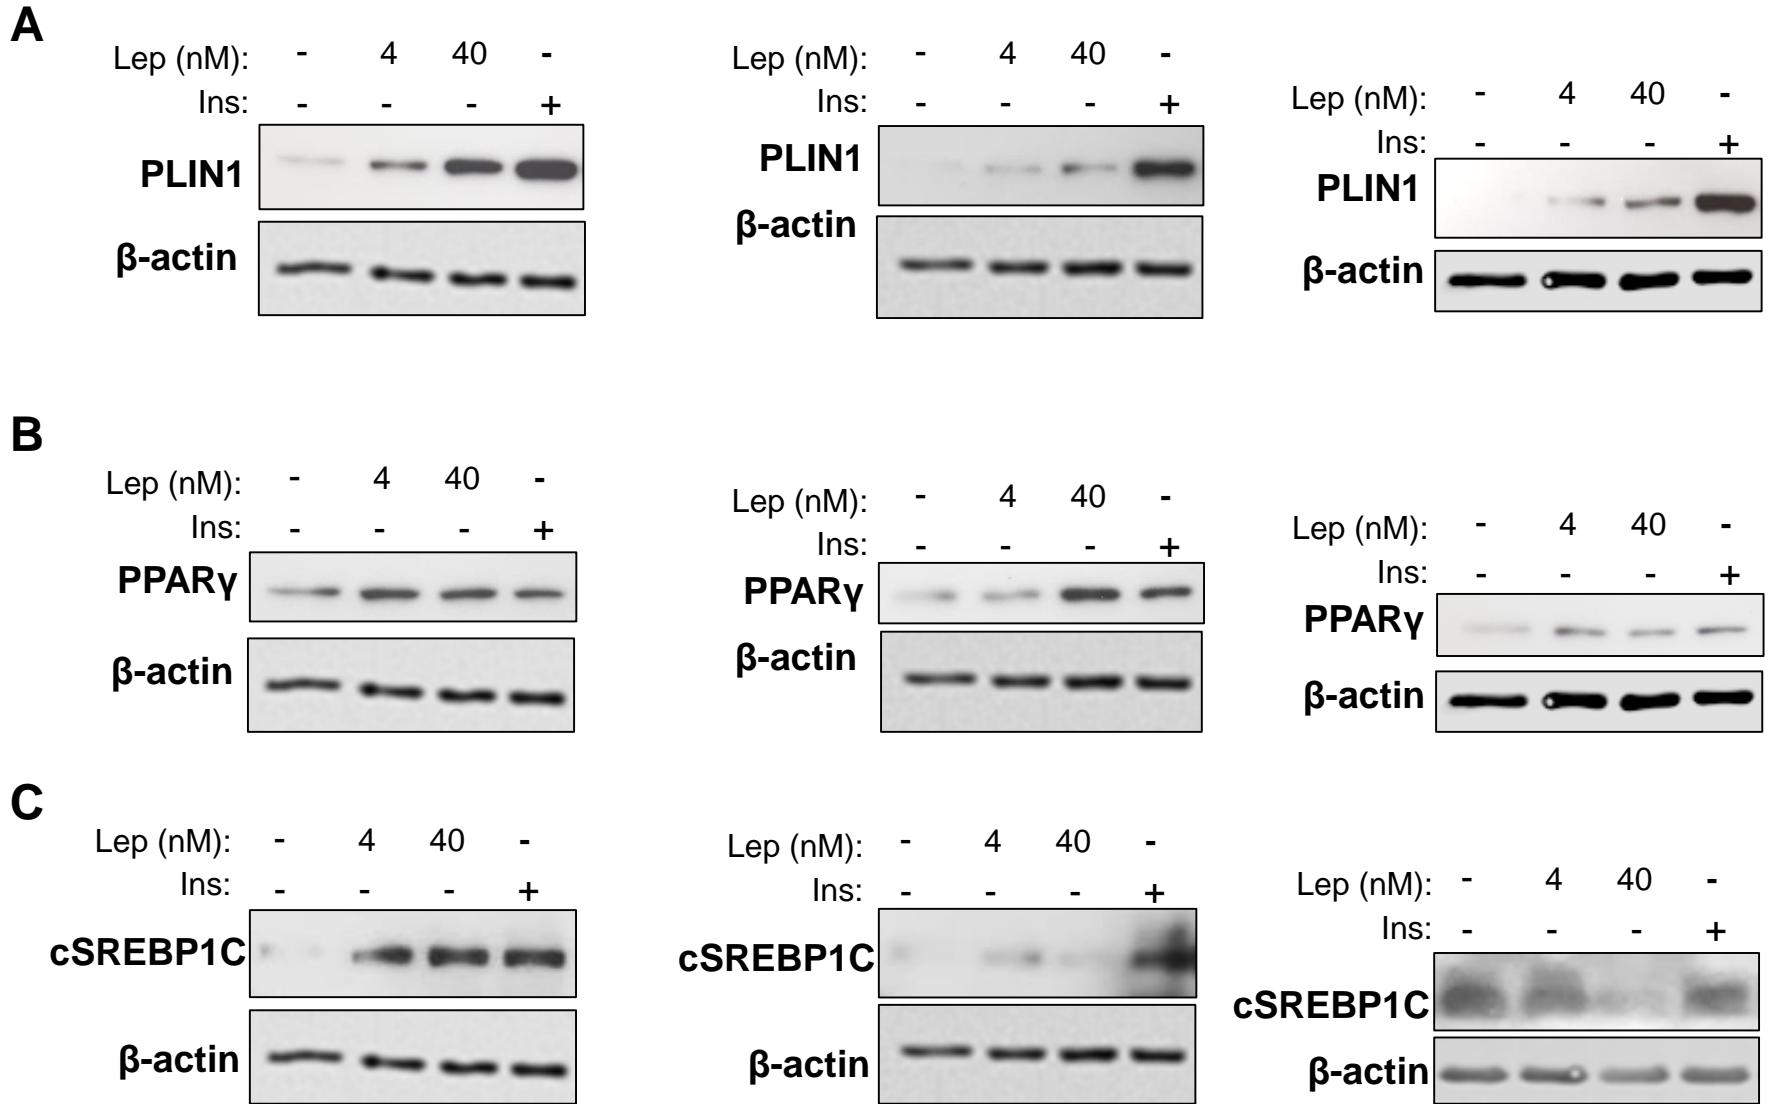

## Replicates Figure

### A-C.

**PPAR $\gamma$ , cSREBP1C and PLIN1 replicates relative to figure 7D.** Subcutaneous ASCs were differentiated into adipocytes for 5 days and treated with 0, 4 or 40 nM of leptin, in the presence or absence of insulin from day 0 on. Lysates were analysed by Western blot for the expression of PLIN1 (**A**), PPAR $\gamma$  (**B**) and cSREBP1C (**C**). Blots represent 3 independent experiments and same the last panel (cSREBP1C) is from a different experiment.

**D**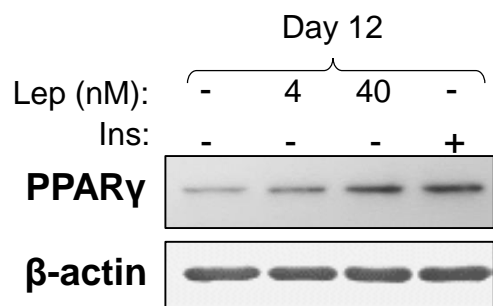**E**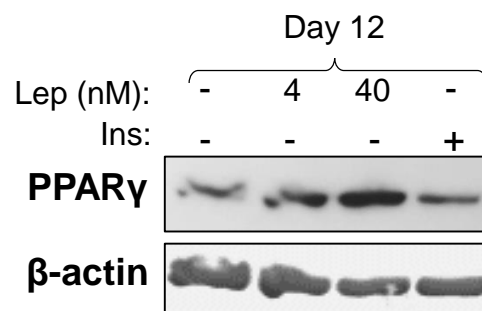**F**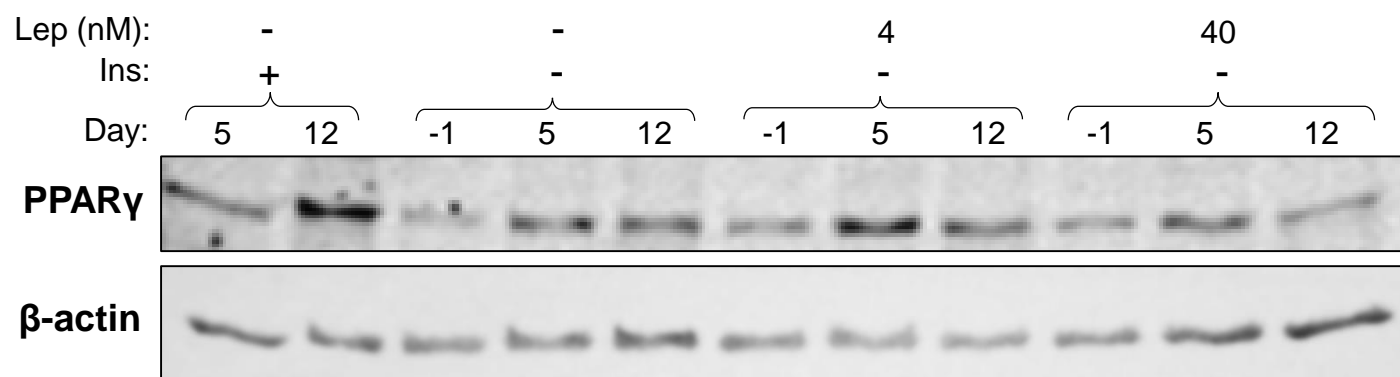**Replicates Figure 7****D-F.**

**PPAR $\gamma$  replicates relative to figure 7E.** Retroperitoneal ASCs differentiated into adipocytes for 5 or 12 days were treated with 0, 4 or 40 nM of leptin, in the presence or absence of insulin from day 0 on. Lysates were analysed by Western blot for PPAR $\gamma$  expression. Blots are from 3 independent experiments.

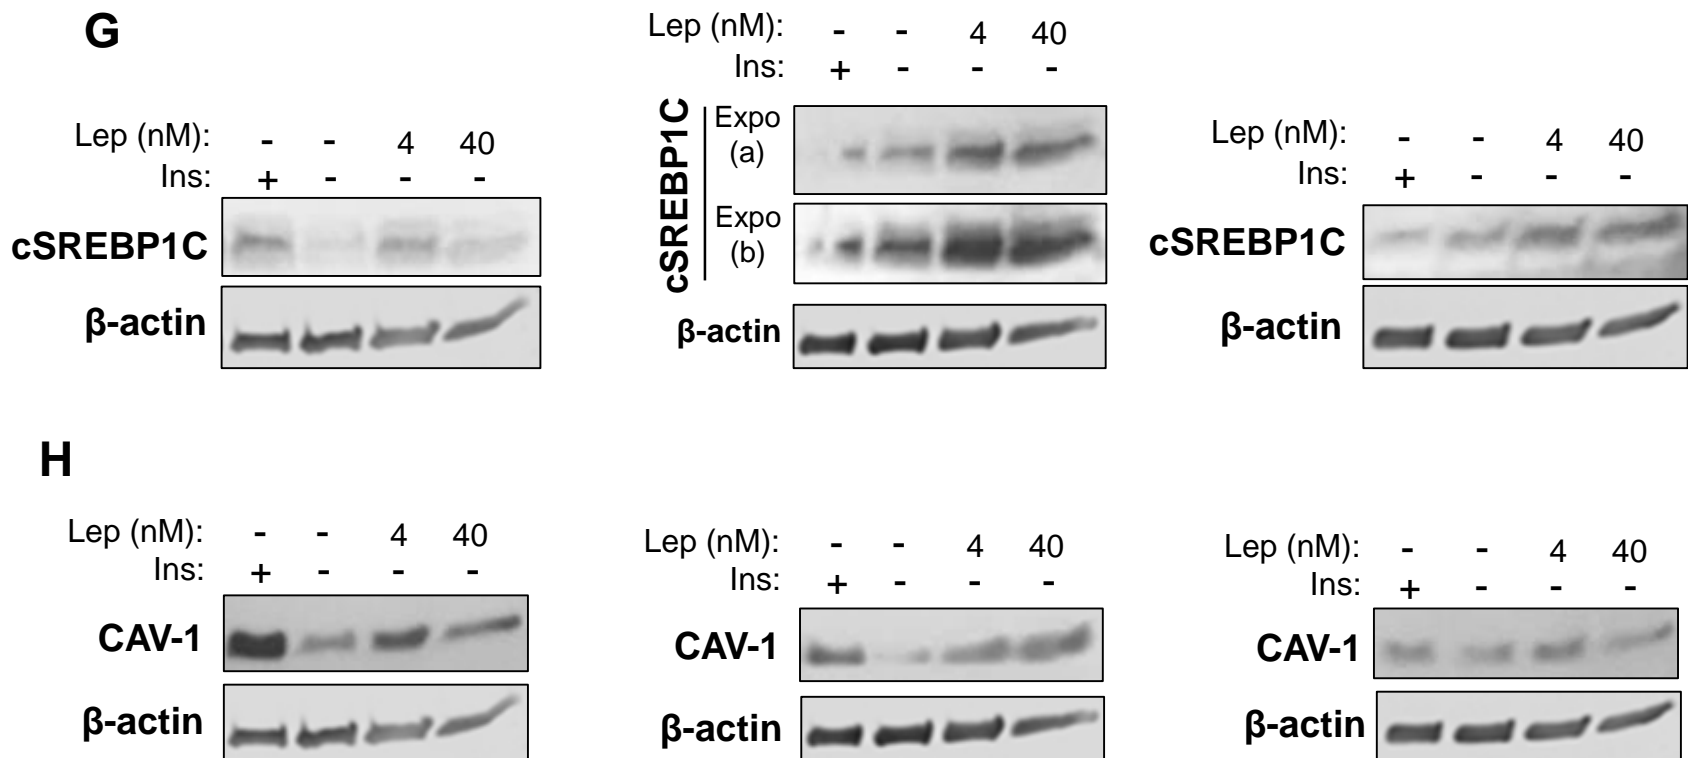

### Replicates Figure 7

#### G-H.

**cSREBP1C** and **CAV-1** replicates relative to figure 7E. Retroperitoneal ASCs differentiated into adipocytes for 12 days were treated with 0, 4 or 40 nM of leptin, in the presence or absence of insulin from day 0 on. Lysates were analysed by Western blot for the expression of CAV-1 (**G**) and cSREBP1C (**H**). Blots are from 3 independent experiments.
