# Supplementary material for: Leptin Induces Proadipogenic and Proinflammatory Signaling in Adipocytes
Source: PubMed Central journal article supplement (PMC6923660; doi:10.3389/fendo.2019.00841), 2019-12-13
Supplement: Image_3.pdf [file Image_3.pdf]

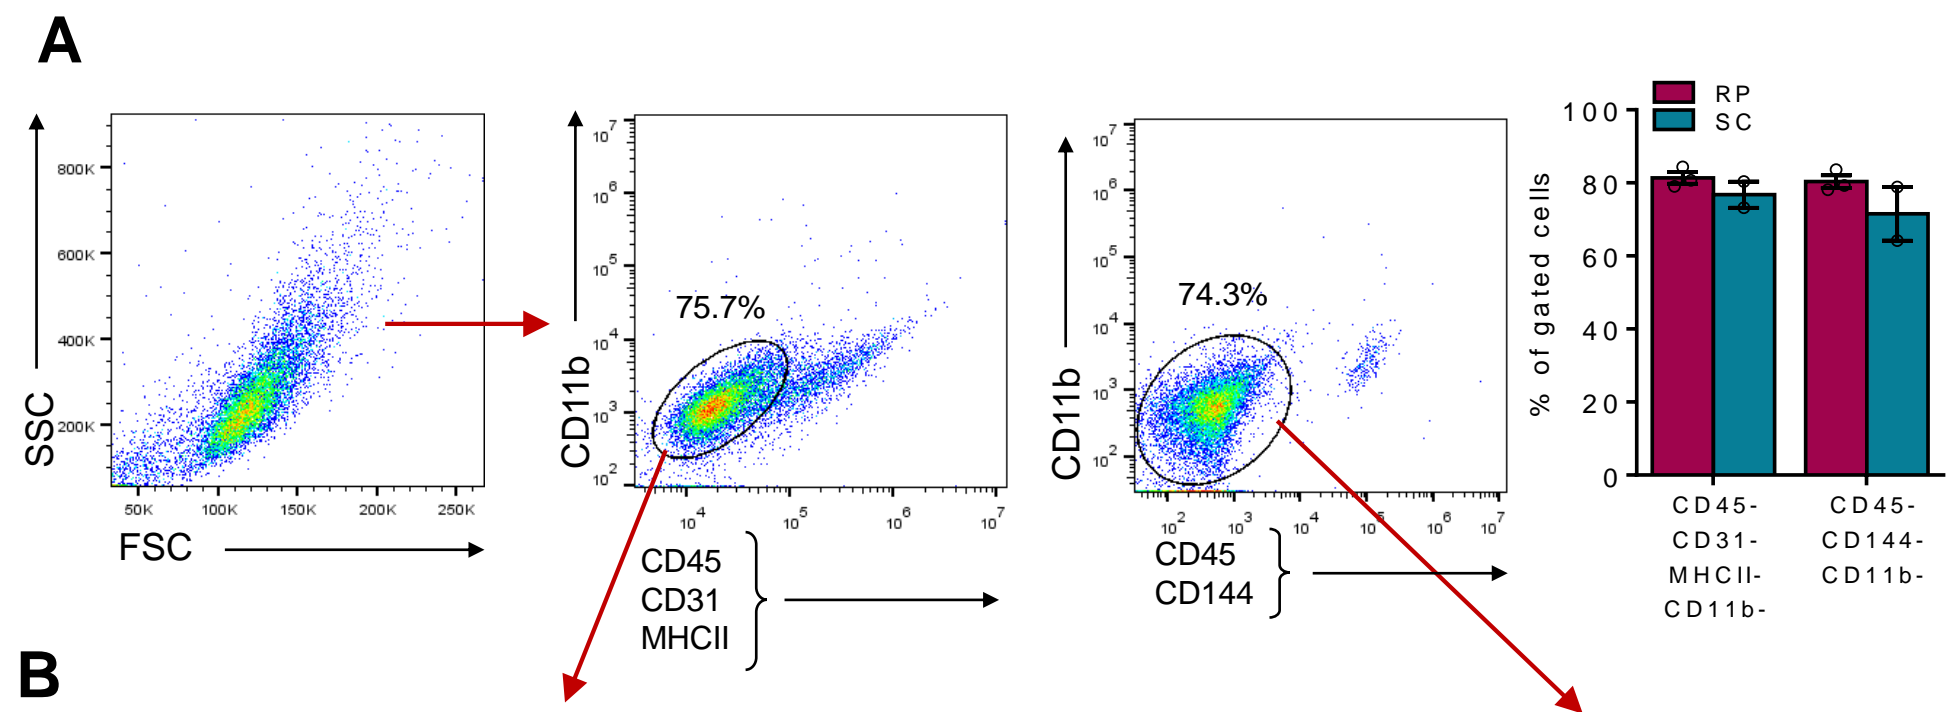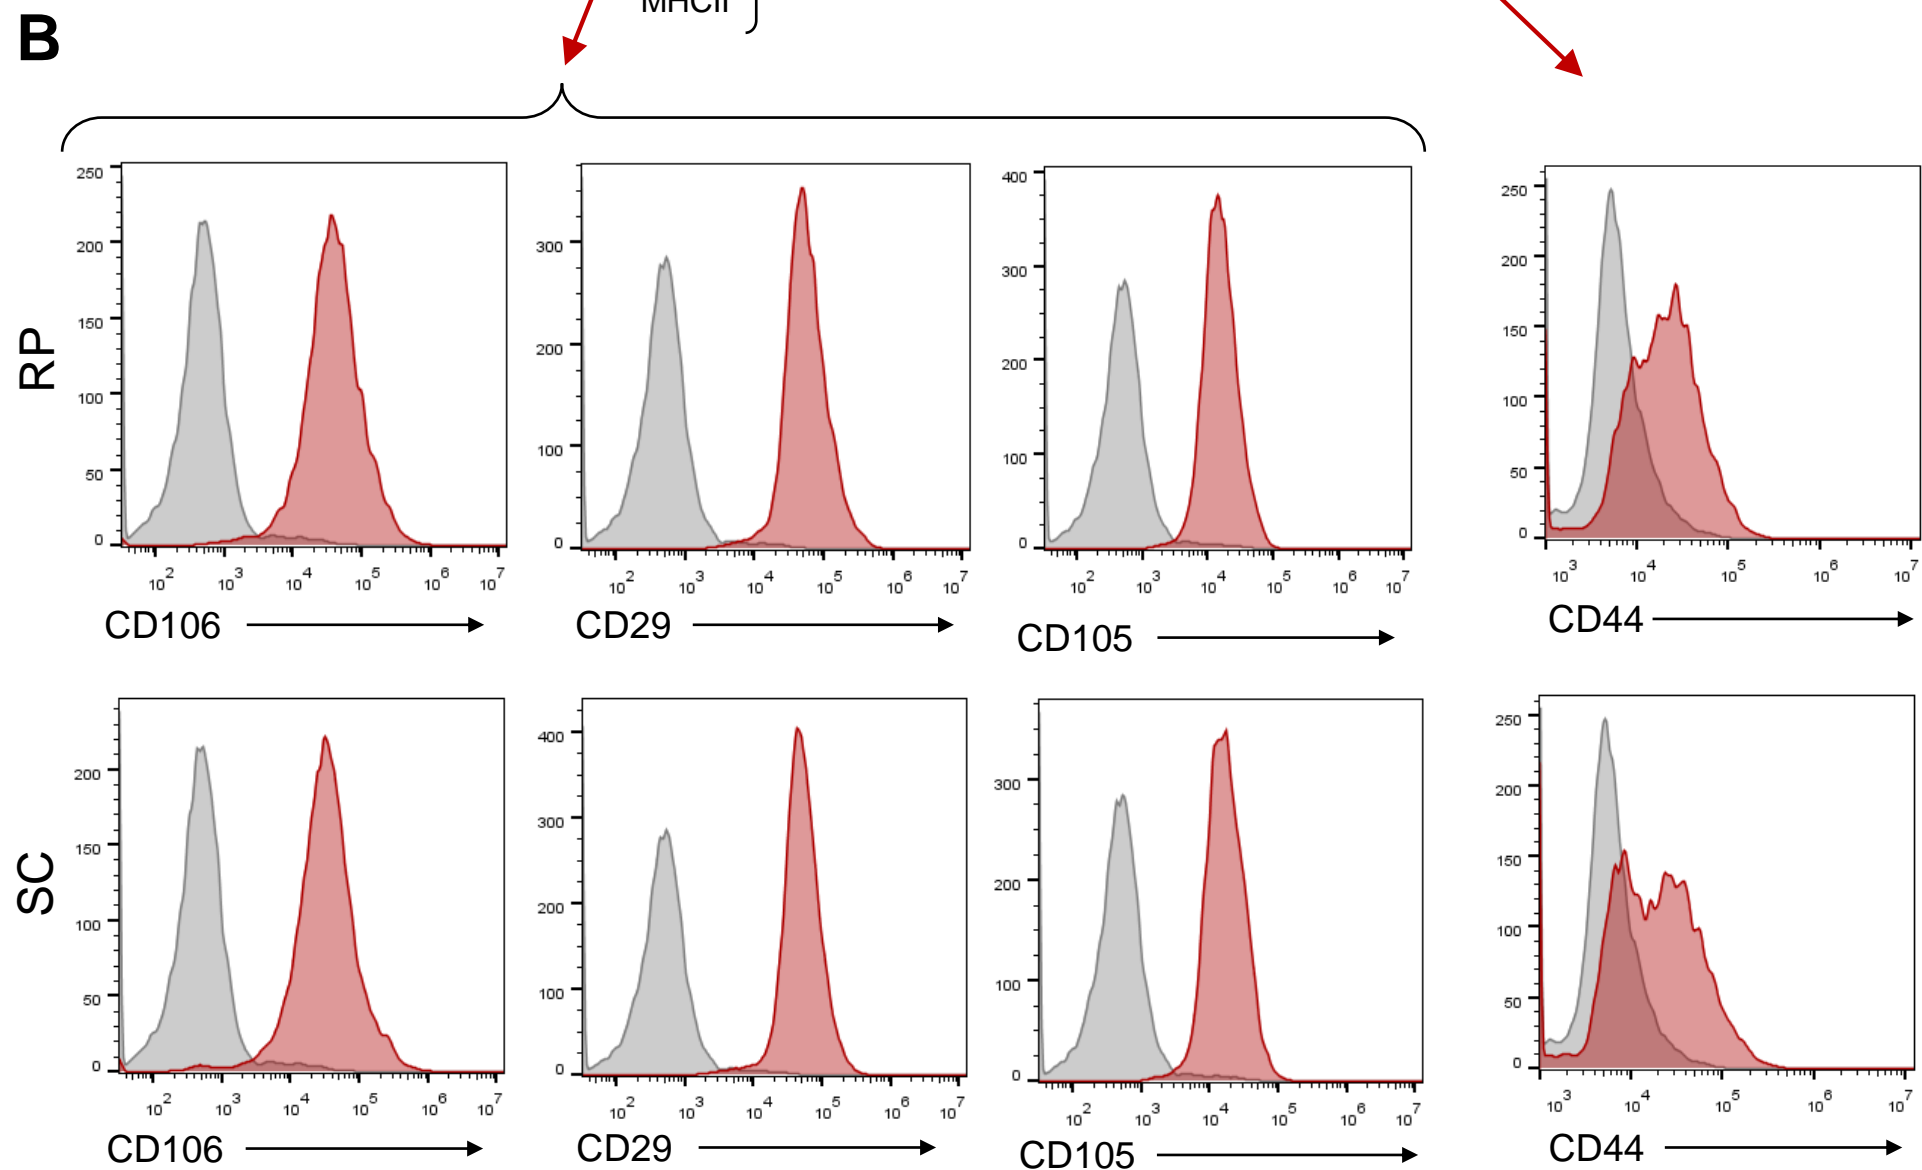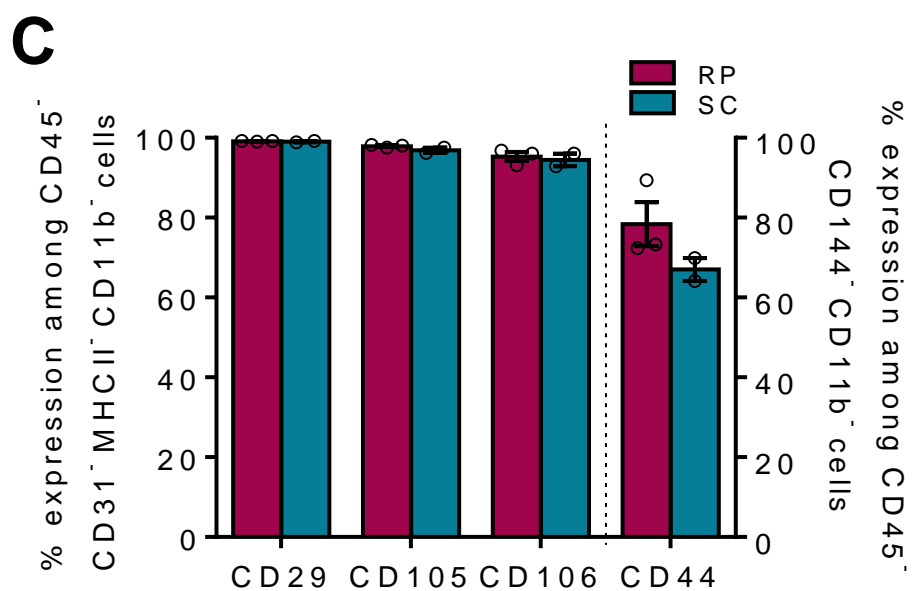

**Supplementary figure 3. Characterization of adipose tissue-derived ASCs.** (A) Gating strategy of non-leukocyte and non-endothelial cells (CD45<sup>-</sup>, CD11b<sup>-</sup>, MHC class II<sup>-</sup> and CD31<sup>-</sup> or CD45<sup>-</sup>, CD11b<sup>-</sup> and CD144<sup>-</sup>) among cells from stromal vascular fraction of subcutaneous (SC) or retroperitoneal (RP) adipose tissue. Representative dot plots from the fluorescence minus one (FMO) control in each strategy. (B) Expression of the ASCs markers CD29, CD105, CD106 and CD44 among non-leukocyte and non-endothelial cells in stromal vascular fraction of SC or RP adipose tissue. Gray histograms represent the fluorescence of cells incubated with isotype-matched IgGs using the same gating strategy from FMO control in each condition. (C) The percentage of cells expressing each ASCs marker among RP- or SC-derived gated cells. Bars represent mean  $\pm$  SEM of 5 independent pools of cells, indicated by each dot.
