# Supplementary material for: Leptin Induces Proadipogenic and Proinflammatory Signaling in Adipocytes
Source: PubMed Central journal article supplement (PMC6923660; doi:10.3389/fendo.2019.00841), 2019-12-13
Supplement: Image_4.pdf [file Image_4.pdf]

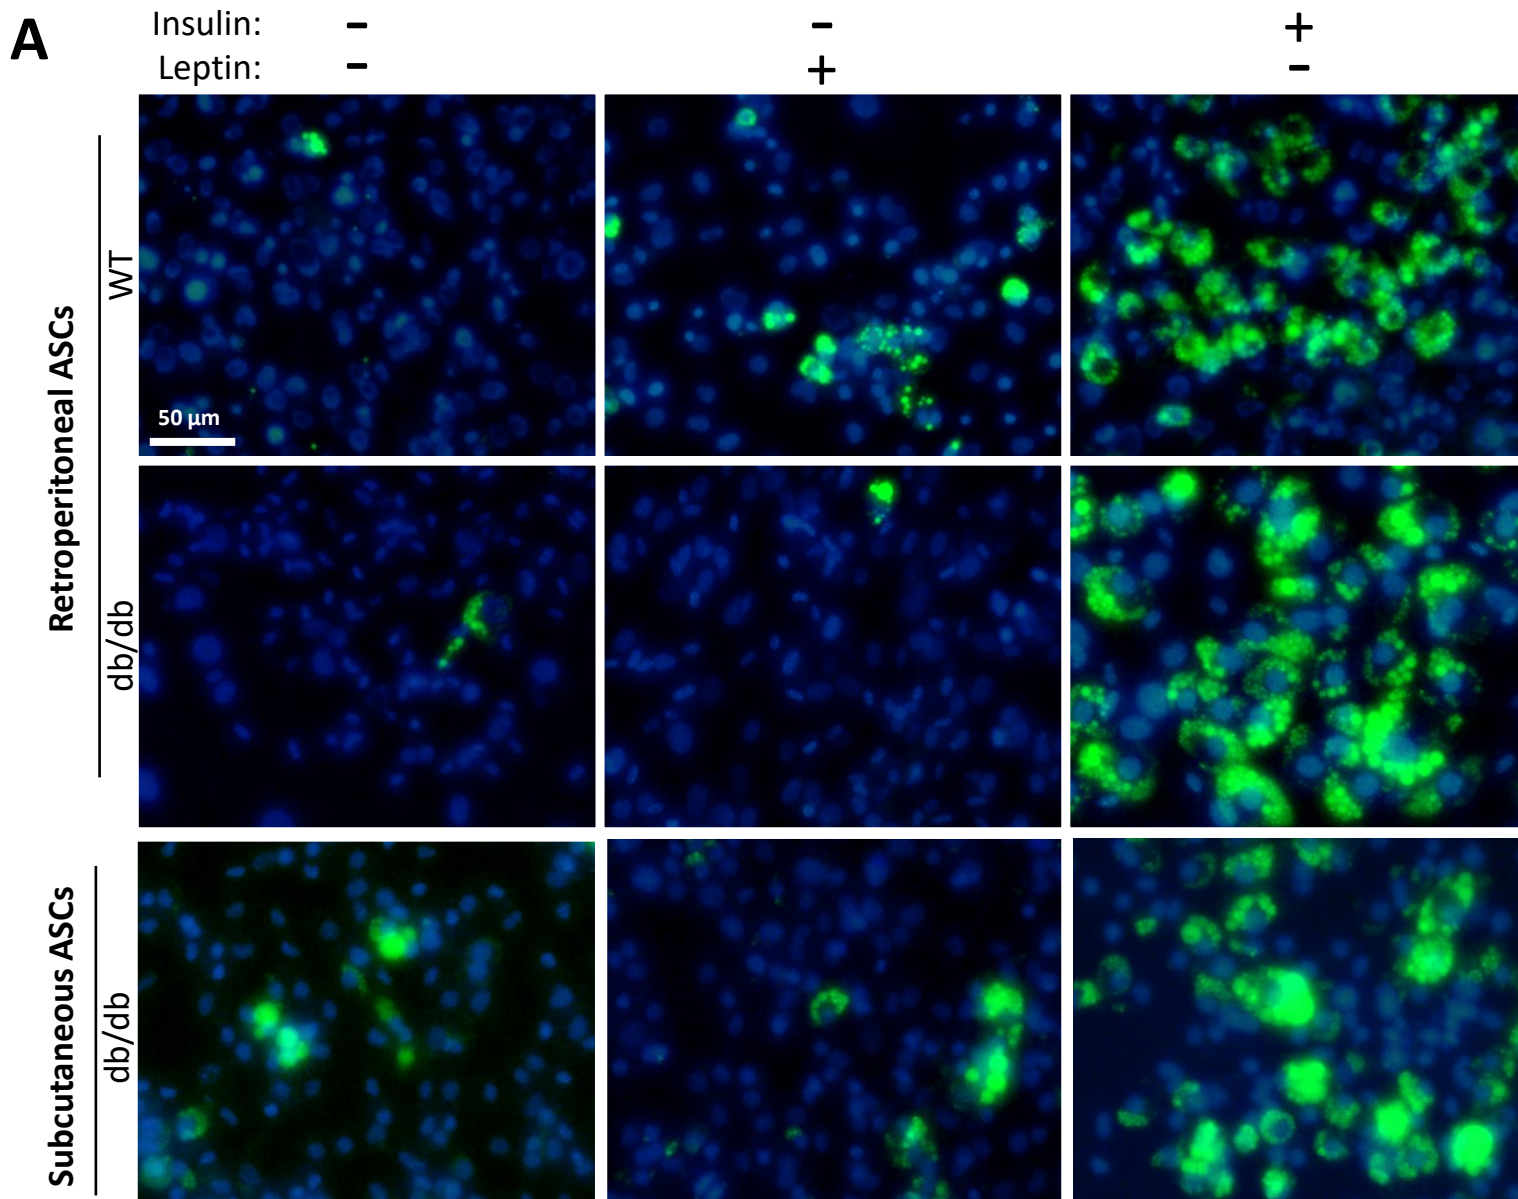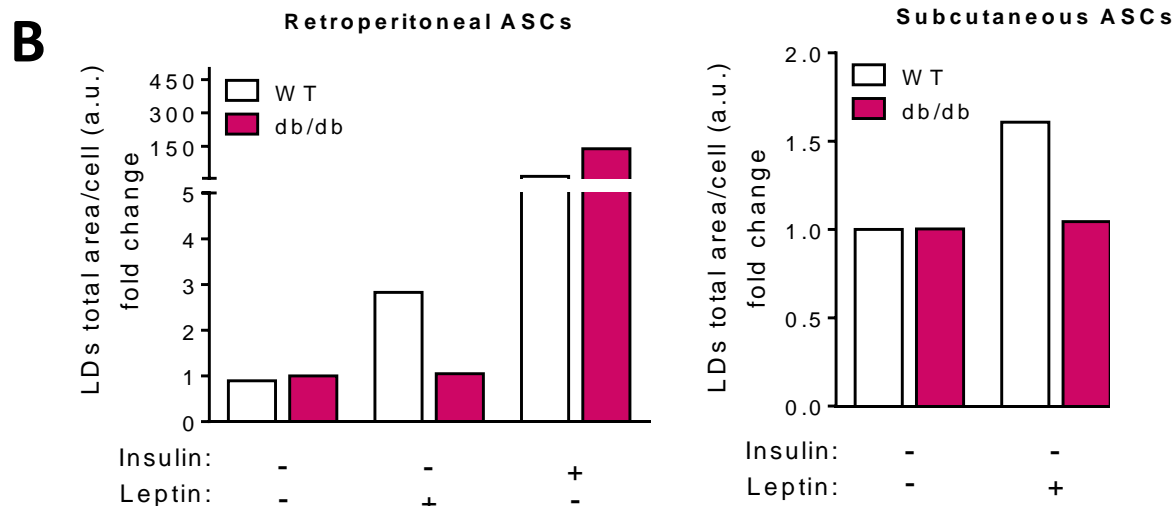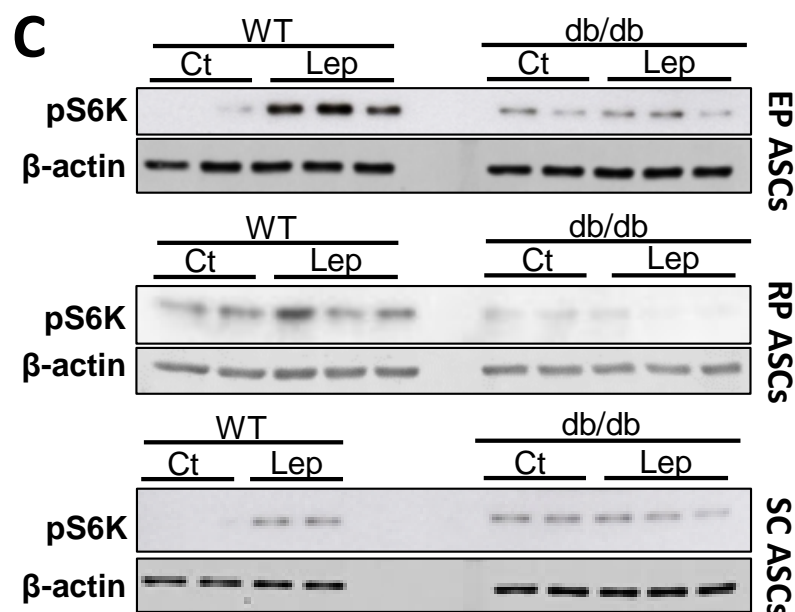

**Supplementary Figure 4. Leptin acts strictly through the leptin receptor (LepR) in ASCs.** (A) Fluorescence microscopic images of retroperitoneal and subcutaneous ASCs with 4 days of differentiation stained with Bodipy (green) for lipid droplets and DAPI (blue) for nuclei. (B) Quantification of the green area (lipid droplets) per cell. (C) Western blot analysis of phospho-S6K and  $\beta$ -actin in ASCs from 4 days-differentiated epididymal (EP), retroperitoneal (RP) and subcutaneous (SC) ASCs. Images and blots are representative of 1 experiment with 1 db/db mouse and pooled tissues from 2 WT mice. Bars represent the mean of 10-35 images from 1 experiment.
